# Supplementary material for: Intravesical BCG in patients with non-muscle invasive bladder cancer induces trained immunity and decreases respiratory infections
Source: PubMed Central journal article supplement — J Immunother Cancer. 2023 Jan 24;11(1):e005518. doi: 10.1136/jitc-2022-005518 (PMC9884868; doi:10.1136/jitc-2022-005518), 2023-01-24
Supplement: jitc-2022-005518supp003.pdf [file jitc-2022-005518supp003.pdf]

**Supplementary Table 1 - Inclusion and exclusion criteria for the Tribute study.**

| <b>Inclusion criteria</b>                                                                                                                                                                         |
|---------------------------------------------------------------------------------------------------------------------------------------------------------------------------------------------------|
| 1. Presence of high-grade Ta or T1 urothelial carcinoma of the bladder with or without CIS; tumor can be primary or recurrent                                                                     |
| 2. Able to communicate in Dutch, and read and understand the patient information and informed consent form and fill out questionnaires                                                            |
| 3. Complete resection of (visible) tumor at start of BCG therapy as determined via re-TURT or negative cystoscopy/cytology (at most 6 weeks prior to BCG therapy initiation)                      |
|                                                                                                                                                                                                   |
| <b>Exclusion criteria</b>                                                                                                                                                                         |
| 1. Any previous intravesical BCG therapy                                                                                                                                                          |
| 2. Presence of primary CIS only                                                                                                                                                                   |
| 3. Presence of histopathologically proven muscle-invasive urothelial carcinoma of the bladder at first or re-TUR surgical specimens                                                               |
| 4. Presence of tumor stage cN1 of cM1 as assessed by CT-thorax/abdomen                                                                                                                            |
| 5. Presence of any upper urinary tract tumors                                                                                                                                                     |
| 6. Histology subtype of resected tumor is not predominantly urothelial carcinoma                                                                                                                  |
| 7. Presence of another malignancy other than basal cell carcinoma of the skin or prostate cancer under active surveillance                                                                        |
| 8. Presence of pregnancy or lactation                                                                                                                                                             |
| 9. Presence of active tuberculosis, any form of immunodeficiency (e.g. HIV + serology, transplant recipients) and/or any other contraindication of BCG therapy                                    |
| 10. Patients who have received any systemic cytostatic agents within the last 3 months                                                                                                            |
| 11. Patients younger than 18 and older than 90 years of age                                                                                                                                       |
| 12. Patients with uncontrollable urinary tract infection                                                                                                                                          |
| 13. Patients who are deemed unfit for study participation as assessed by their urologist                                                                                                          |
| 14. Patients who receive any of the following: Methotrexate, Rituximab, Infliximab, Etanercept, other Anti-TNF $\alpha$ therapies, Anti IL-6 therapy, Anti IL-17 therapy or IFN- $\gamma$ therapy |

Supplementary Table 2 - Characteristics of patients included in the Tribute study.

|                                                                     |                   |
|---------------------------------------------------------------------|-------------------|
| <b>Gender</b>                                                       | <b>n (%)</b>      |
| Male                                                                | 16 (94)           |
| Female                                                              | 1 (6)             |
|                                                                     |                   |
| <b>Age at inclusion (median <math>\pm</math> range)</b>             | 67 $\pm$ 37 years |
|                                                                     |                   |
| <b>Highest tumor stage at study inclusion<sup>1</sup></b>           | <b>n (%)</b>      |
| Ta                                                                  | 7 (41)            |
| T1                                                                  | 10 (59)           |
|                                                                     |                   |
| <b>Highest tumor grade at study inclusion<sup>1</sup></b>           | <b>n (%)</b>      |
| Grade 1                                                             | 0 (0)             |
| Grade 2a                                                            | 0 (0)             |
| Grade 2b                                                            | 2 (12)            |
| Grade 3                                                             | 15 (88)           |
|                                                                     |                   |
| <b>Concomitant CIS at study inclusion</b>                           | <b>n (%)</b>      |
| Yes                                                                 | 6 (35)            |
| No                                                                  | 11 (65)           |
|                                                                     |                   |
| <b>Total number of BCG received in the year after start BCG</b>     | <b>n (%)</b>      |
| 5 or 6                                                              | 2 (12)            |
| 7 - 9                                                               | 3 (18)            |
| 10 - 12                                                             | 5 (29)            |
| 13 - 15                                                             | 7 (41)            |
|                                                                     |                   |
| <b>Recurrence</b>                                                   | <b>n (%)</b>      |
| Yes                                                                 | 5 (29)            |
| No                                                                  | 12 (71)           |
|                                                                     |                   |
| <b>Reason for discontinuation with BCG or irregular BCG regimen</b> | <b>n</b>          |
| Side effects                                                        | 4                 |
| Tumor progression                                                   | 2                 |
| BCG shortage                                                        | 1                 |
| Other                                                               | 4                 |
|                                                                     |                   |
| <b>Clinical follow-up time</b>                                      | <b>months</b>     |
| Minimum                                                             | 21                |
| Maximum                                                             | 41                |

<sup>1</sup>The highest tumor stage/grade is reported as the highest stage or grade which was found in the pathology report at the transurethral resection of the bladder tumor (TUR) or re-TUR of study inclusion.

### Supplementary Table 3 - Overview of the concentration of circulating leukocytes in whole blood measured at different time points during BCG therapy in the Tribute study.

Values are displayed as median  $\pm$  range. Two-tailed matched-pairs Wilcoxon signed-rank test was used to determine statistical significant difference between time points. Statistical significance was accepted at  $p < 0.05$ .

| Cell type                               | Time points and comparisons |                 |                                   |                 |                                     |                   |                                           |                 |                                     |                   |                                            |                 |                                    |                  |                                            |                 |                                    |
|-----------------------------------------|-----------------------------|-----------------|-----------------------------------|-----------------|-------------------------------------|-------------------|-------------------------------------------|-----------------|-------------------------------------|-------------------|--------------------------------------------|-----------------|------------------------------------|------------------|--------------------------------------------|-----------------|------------------------------------|
|                                         | pre-BCG1<br>n=17            | BCG 2<br>n=17   | p-value<br>BCG2 :<br>Pre-<br>BCG1 | BCG 6<br>n=16   | p-value<br>BCG 6 :<br>Pre-<br>BCG 1 | pre-BCG 7<br>n=14 | p-value<br>Pre-<br>BCG7 :<br>Pre-<br>BCG1 | BCG 9<br>n=12   | p-value<br>BCG 9 :<br>Pre-<br>BCG 1 | pre-BCG 10<br>n=8 | p-value<br>Pre-<br>BCG10 :<br>Pre-<br>BCG1 | BCG 12<br>n=7   | p-value<br>BCG12 :<br>Pre-<br>BCG1 | pre-BCG13<br>n=3 | p-value<br>Pre-<br>BCG13 :<br>Pre-<br>BCG1 | BCG 15<br>n=3   | p-value<br>BCG15 :<br>Pre-<br>BCG1 |
| White blood cells (x10 <sup>9</sup> /L) | 6.44 $\pm$ 6.66             | 7.15 $\pm$ 6.87 | <b>p&lt;0.01</b>                  | 6.71 $\pm$ 6.29 | 0.35                                | 6.98 $\pm$ 7.01   | 0.15                                      | 7.09 $\pm$ 6.72 | 0.42                                | 7.10 $\pm$ 10.56  | 0.15                                       | 8.47 $\pm$ 6.30 | 0.08                               | 6.63 $\pm$ 1.21  | 0.50                                       | 7.17 $\pm$ 2.33 | 0.50                               |
| Neutrophils (x10 <sup>9</sup> /L)       | 3.78 $\pm$ 5.27             | 4.18 $\pm$ 5.81 | <b>p&lt;0.01</b>                  | 4.18 $\pm$ 5.53 | 0.10                                | 3.88 $\pm$ 6.72   | 0.28                                      | 4.04 $\pm$ 6.08 | 0.09                                | 3.99 $\pm$ 9.29   | 0.15                                       | 5.8 $\pm$ 5.53  | 0.08                               | 3.56 $\pm$ 0.80  | 0.75                                       | 4.33 $\pm$ 1.32 | 0.50                               |
| Monocytes (x10 <sup>9</sup> /L)         | 0.64 $\pm$ 0.63             | 0.75 $\pm$ 0.75 | <b>p&lt;0.01</b>                  | 0.68 $\pm$ 0.74 | 0.70                                | 0.68 $\pm$ 0.64   | 0.15                                      | 0.72 $\pm$ 0.49 | 0.31                                | 0.65 $\pm$ 1.57   | 0.64                                       | 0.65 $\pm$ 0.20 | 0.89                               | 0.65 $\pm$ 0.06  | 0.75                                       | 0.73 $\pm$ 0.32 | 0.50                               |
| Lymphocytes (x10 <sup>9</sup> /L)       | 1.98 $\pm$ 2.71             | 1.89 $\pm$ 3.10 | 0.35                              | 1.89 $\pm$ 2.62 | 0.13                                | 2.02 $\pm$ 2.52   | 0.73                                      | 1.67 $\pm$ 1.79 | 0.15                                | 1.89 $\pm$ 0.90   | p>0.99                                     | 1.86 $\pm$ 0.82 | <b>p&lt;0.05</b>                   | 2.47 $\pm$ 1.02  | 0.25                                       | 2.03 $\pm$ 0.85 | 0.25                               |

**Supplementary Table 4 - Results from the ChIP-seq analysis.**

Comparisons in H3K4me3 signal were made between pre-BCG1 and any of the measured post-BCG time points (i.e., BCG6, pre-BCG7, BCG9 and pre-BCG10).

Candidate trained immunity genes are indicated in the final column.

| Genomic location          | Comparison (up/down in H3K4me3 signal) | log2 fold change | p value     | adjusted p value | Distance to gene (in bp) | Nearest Gene | Candidate trained immunity gene |
|---------------------------|----------------------------------------|------------------|-------------|------------------|--------------------------|--------------|---------------------------------|
| chr10_77636776_77638793   | pre-BCG1_v_BCG6_up                     | 0,689051403      | 0,007152971 | 0,998975358      | 95266                    | C10orf11     |                                 |
| chr11_111512299_111512995 | pre-BCG1_v_BCG6_up                     | 0,654214908      | 0,002777022 | 0,998975358      | 39532                    | SIK2         |                                 |
| chr16_57416786_57417262   | pre-BCG1_v_BCG6_up                     | 0,738508555      | 0,01150535  | 0,998975358      | 10654                    | CX3CL1       |                                 |
| chr17_44911270_44911728   | pre-BCG1_v_BCG6_up                     | 0,804794584      | 0,005248445 | 0,998975358      | -15373                   | WNT3         |                                 |
| chr17_63848797_63849266   | pre-BCG1_v_BCG6_up                     | 1,004453929      | 0,010607428 | 0,998975358      | -291267                  | AXIN2        |                                 |
| chr17_68599032_68601980   | pre-BCG1_v_BCG6_up                     | 0,595314616      | 0,046093502 | 0,998975358      | 434830                   | KCNJ2        |                                 |
| chr19_44808740_44809365   | pre-BCG1_v_BCG6_up                     | 0,590164057      | 0,031538809 | 0,998975358      | 125                      | ZNF235       |                                 |
| chr2_218065225_218065862  | pre-BCG1_v_BCG6_up                     | 0,743442953      | 0,022465992 | 0,998975358      | -340757                  | TNP1         |                                 |
| chr2_38535872_38536457    | pre-BCG1_v_BCG6_up                     | 0,602418985      | 0,005357174 | 0,998975358      | 68239                    | ATL2         |                                 |
| chr2_47369090_47369828    | pre-BCG1_v_BCG6_up                     | 0,624761536      | 0,019328058 | 0,998975358      | 13058                    | C2orf61      |                                 |
| chr3_127915089_127915604  | pre-BCG1_v_BCG6_up                     | 0,755085202      | 0,011702195 | 0,998975358      | 43050                    | EEFSEC       |                                 |
| chr3_9916678_9917495      | pre-BCG1_v_BCG6_up                     | 0,694519145      | 0,00221225  | 0,998975358      | 3108                     | CIDEC        |                                 |
| chr7_6526535_6527062      | pre-BCG1_v_BCG6_up                     | 0,671134314      | 0,005140945 | 0,998975358      | -2926                    | KDELR2       |                                 |
| chr8_75407155_75407974    | pre-BCG1_v_BCG6_up                     | 0,582119322      | 0,002380173 | 0,998975358      | 144948                   | GDAP1        |                                 |
| chr8_76677782_76678320    | pre-BCG1_v_BCG6_up                     | 0,6499125        | 0,010108019 | 0,998975358      | 225947                   | HNF4G        |                                 |
| chrX_25012752_25013765    | pre-BCG1_v_BCG6_up                     | 0,613390269      | 0,002318506 | 0,998975358      | 20806                    | ARX          |                                 |
| chr1_26786255_26786966    | pre-BCG1_v_BCG6_down                   | -0,758714745     | 0,000637101 | 0,998975358      | -12399                   | HMG2         |                                 |
| chr1_40388717_40389694    | pre-BCG1_v_BCG6_down                   | -0,770655267     | 0,004079169 | 0,998975358      | -21521                   | MYCL         |                                 |
| chr10_15169051_15169800   | pre-BCG1_v_BCG6_down                   | -0,760960308     | 0,012395145 | 0,998975358      | 30045                    | RPP38        |                                 |
| chr10_8060651_8061174     | pre-BCG1_v_BCG6_down                   | -0,62168621      | 0,019991692 | 0,998975358      | -35743                   | GATA3        |                                 |
| chr10_96270807_96271460   | pre-BCG1_v_BCG6_down                   | -0,746021321     | 0,00105717  | 0,998975358      | -34440                   | HELLS        |                                 |
| chr11_2988806_2989632     | pre-BCG1_v_BCG6_down                   | -0,651435773     | 0,024984251 | 0,998975358      | 24388                    | NAP1L4       |                                 |
| chr12_123075234_123076132 | pre-BCG1_v_BCG6_down                   | -0,587435259     | 0,024800866 | 0,998975358      | 63888                    | KNTC1        |                                 |
| chr12_48918053_48918675   | pre-BCG1_v_BCG6_down                   | -0,666184082     | 0,038377299 | 0,998975358      | -1051                    | OR8S1        |                                 |
| chr12_9675023_9675706     | pre-BCG1_v_BCG6_down                   | -0,789100749     | 0,025203784 | 0,998975358      | 85117                    | KLRB1        |                                 |

|                          |                      |              |             |             |         |          |  |
|--------------------------|----------------------|--------------|-------------|-------------|---------|----------|--|
| chr13_40984594_40985410  | pre-BCG1_v_BCG6_down | -0,60454567  | 0,011782629 | 0,998975358 | 255732  | FOXO1    |  |
| chr13_99215373_99216071  | pre-BCG1_v_BCG6_down | -0,752790041 | 0,005675127 | 0,998975358 | -41470  | STK24    |  |
| chr16_83805581_83806134  | pre-BCG1_v_BCG6_down | -0,602580499 | 0,038564865 | 0,998975358 | -35590  | HSBP1    |  |
| chr17_18186002_18186641  | pre-BCG1_v_BCG6_down | -0,772853983 | 0,012562824 | 0,998975358 | 21898   | MIEF2    |  |
| chr17_47737581_47738271  | pre-BCG1_v_BCG6_down | -0,618225314 | 0,048005259 | 0,998975358 | 17599   | SPOP     |  |
| chr18_32771283_32771916  | pre-BCG1_v_BCG6_down | -0,666942798 | 0,042069708 | 0,998975358 | -49401  | ZNF397   |  |
| chr19_14583197_14584356  | pre-BCG1_v_BCG6_down | -0,639228815 | 0,04487689  | 0,998975358 | 2397    | PTGER1   |  |
| chr19_34391821_34392175  | pre-BCG1_v_BCG6_down | -1,440010467 | 0,012998197 | 0,998975358 | 102707  | KCTD15   |  |
| chr19_50418781_50420147  | pre-BCG1_v_BCG6_down | -0,726567574 | 0,000165907 | 0,998975358 | -12936  | ATF5     |  |
| chr19_6996859_6998063    | pre-BCG1_v_BCG6_down | -0,739060745 | 0,007235638 | 0,998975358 | -33128  | MBD3L5   |  |
| chr19_9362846_9363386    | pre-BCG1_v_BCG6_down | -0,756396915 | 0,02165982  | 0,998975358 | 1510    | OR7E24   |  |
| chr2_100141611_100142647 | pre-BCG1_v_BCG6_down | -0,583964804 | 0,012887171 | 0,998975358 | -35632  | REV1     |  |
| chr2_102419197_102419709 | pre-BCG1_v_BCG6_down | -0,617440627 | 0,014536048 | 0,998975358 | 104910  | MAP4K4   |  |
| chr2_143247185_143247952 | pre-BCG1_v_BCG6_down | -0,680016677 | 0,014482225 | 0,998975358 | -358299 | LRP1B    |  |
| chr2_190359957_190360441 | pre-BCG1_v_BCG6_down | -0,585789115 | 0,037226339 | 0,998975358 | 54040   | WDR75    |  |
| chr20_44969409_44970473  | pre-BCG1_v_BCG6_down | -0,630627511 | 0,011993377 | 0,998975358 | 21872   | SLC35C2  |  |
| chr22_30940258_30940863  | pre-BCG1_v_BCG6_down | -0,769205896 | 0,02897983  | 0,998975358 | 2108    | SEC14L6  |  |
| chr22_31288619_31289191  | pre-BCG1_v_BCG6_down | -1,130939237 | 0,001578769 | 0,998975358 | 75282   | MORC2    |  |
| chr22_50469375_50470019  | pre-BCG1_v_BCG6_down | -0,661225179 | 0,036962161 | 0,998975358 | -18609  | IL17REL  |  |
| chr3_108125146_108126412 | pre-BCG1_v_BCG6_down | -0,618515416 | 0,006136101 | 0,998975358 | 104447  | HHLA2    |  |
| chr3_195540047_195540679 | pre-BCG1_v_BCG6_down | -1,119650598 | 0,001262186 | 0,998975358 | -1215   | MUC4     |  |
| chr3_28292893_28294004   | pre-BCG1_v_BCG6_down | -0,592031587 | 0,01612779  | 0,998975358 | 10363   | CMC1     |  |
| chr4_69759047_69759990   | pre-BCG1_v_BCG6_down | -0,705055899 | 0,012000652 | 0,998975358 | 57990   | UGT2A3   |  |
| chr5_119333328_119334023 | pre-BCG1_v_BCG6_down | -0,673871289 | 0,029384374 | 0,998975358 | 368383  | FAM170A  |  |
| chr5_138369920_138370524 | pre-BCG1_v_BCG6_down | -0,899239115 | 0,004222722 | 0,998975358 | -159243 | LRRTM2   |  |
| chr5_150846511_150847193 | pre-BCG1_v_BCG6_down | -0,716839438 | 0,002174625 | 0,998975358 | 19695   | SLC36A1  |  |
| chr5_56159746_56160675   | pre-BCG1_v_BCG6_down | -0,615806547 | 0,041983077 | 0,998975358 | -44876  | SETD9    |  |
| chr6_127899285_127901264 | pre-BCG1_v_BCG6_down | -0,624973191 | 0,008861184 | 0,998975358 | 1956    | C6orf58  |  |
| chr6_139839585_139840271 | pre-BCG1_v_BCG6_down | -0,604446506 | 0,027189014 | 0,998975358 | -144171 | CITED2   |  |
| chr6_158649979_158651155 | pre-BCG1_v_BCG6_down | -0,695646842 | 0,002252665 | 0,998975358 | 61183   | GTF2H5   |  |
| chr7_18495755_18496388   | pre-BCG1_v_BCG6_down | -0,816832621 | 0,004153717 | 0,998975358 | -39854  | HDAC9    |  |
| chr7_38362900_38363577   | pre-BCG1_v_BCG6_down | -0,977123545 | 0,007895706 | 0,998975358 | 145415  | STARD3NL |  |

|                           |                          |              |             |             |         |          |  |
|---------------------------|--------------------------|--------------|-------------|-------------|---------|----------|--|
| chr8_11494415_11495264    | pre-BCG1_v_BCG6_down     | -0,81473298  | 0,001306633 | 0,998975358 | -66873  | GATA4    |  |
| chr8_47360890_47361635    | pre-BCG1_v_BCG6_down     | -0,749887182 | 0,0038632   | 0,998975358 | -811904 | SPDR     |  |
| chr9_130038378_130038894  | pre-BCG1_v_BCG6_down     | -0,604842598 | 0,036413148 | 0,998975358 | 11831   | GARNL3   |  |
| chr9_35728125_35729024    | pre-BCG1_v_BCG6_down     | -0,624533639 | 0,00549807  | 0,998975358 | -3757   | CREB3    |  |
| chrX_12909856_12910867    | pre-BCG1_v_BCG6_down     | -0,617485179 | 0,012246177 | 0,998975358 | -14377  | TLR8     |  |
| chrX_136648164_136651743  | pre-BCG1_v_BCG6_down     | -0,597976429 | 0,037736277 | 0,998975358 | 1653    | ZIC3     |  |
| chr1_6440247_6440965      | pre-BCG1_v_pre-BCG7_up   | 0,83546548   | 0,002150024 | 0,999994721 | 5267    | ACOT7    |  |
| chr2_218065225_218065862  | pre-BCG1_v_pre-BCG7_up   | 0,868386188  | 0,007333457 | 0,999994721 | -340757 | TNP1     |  |
| chr9_121736375_121736868  | pre-BCG1_v_pre-BCG7_up   | 0,620003543  | 0,031364585 | 0,999994721 | 395123  | BRINP1   |  |
| chrX_65407078_65407688    | pre-BCG1_v_pre-BCG7_up   | 0,63097322   | 0,035991197 | 0,999994721 | 24992   | HEPH     |  |
| chr1_16514553_16514998    | pre-BCG1_v_pre-BCG7_down | -0,580738733 | 0,00848568  | 0,999994721 | 24328   | ARHGEF19 |  |
| chr1_167439282_167439705  | pre-BCG1_v_pre-BCG7_down | -0,660770461 | 0,038700354 | 0,999994721 | 48281   | CD247    |  |
| chr1_248404046_248404400  | pre-BCG1_v_pre-BCG7_down | -1,491606368 | 0,039297173 | 0,999994721 | 1992    | OR2M4    |  |
| chr1_44730816_44731405    | pre-BCG1_v_pre-BCG7_down | -0,617265555 | 0,011010381 | 0,999994721 | 51948   | DMAP1    |  |
| chr1_47179267_47179652    | pre-BCG1_v_pre-BCG7_down | -0,655516037 | 0,032840975 | 0,999994721 | 5276    | EFCAB14  |  |
| chr10_69228723_69229856   | pre-BCG1_v_pre-BCG7_down | -0,634107878 | 0,000606902 | 0,999994721 | 226637  | CTNNA3   |  |
| chr10_96270807_96271460   | pre-BCG1_v_pre-BCG7_down | -0,621199545 | 0,00580907  | 0,999994721 | -34440  | HELLS    |  |
| chr10_96699935_96700761   | pre-BCG1_v_pre-BCG7_down | -0,665161093 | 0,018604444 | 0,999994721 | 1920    | CYP2C9   |  |
| chr12_131818687_131819254 | pre-BCG1_v_pre-BCG7_down | -0,597698825 | 0,026005192 | 0,999994721 | -376711 | SFSWAP   |  |
| chr14_102544516_102545186 | pre-BCG1_v_pre-BCG7_down | -0,607150187 | 0,035060911 | 0,999994721 | 61172   | HSP90AA1 |  |
| chr14_23118617_23119253   | pre-BCG1_v_pre-BCG7_down | -0,666449245 | 0,03024756  | 0,999994721 | -15219  | OR6J1    |  |
| chr15_57300317_57302218   | pre-BCG1_v_pre-BCG7_down | -0,697848958 | 0,005520165 | 0,999994721 | 90447   | TCF12    |  |
| chr16_87490634_87491479   | pre-BCG1_v_pre-BCG7_down | -0,60412216  | 0,043686052 | 0,999994721 | 34594   | ZCCHC14  |  |
| chr17_18186002_18186641   | pre-BCG1_v_pre-BCG7_down | -0,680603968 | 0,02686072  | 0,999994721 | 21898   | MIEF2    |  |
| chr17_38967117_38967721   | pre-BCG1_v_pre-BCG7_down | -0,725315035 | 0,004828794 | 0,999994721 | -7958   | TMEM99   |  |
| chr17_60102370_60102793   | pre-BCG1_v_pre-BCG7_down | -0,613147573 | 0,017707941 | 0,999994721 | 40061   | MED13    |  |
| chr17_7838486_7839742     | pre-BCG1_v_pre-BCG7_down | -0,755766647 | 9,27E-05    | 0,549122361 | 3641    | CNTROB   |  |
| chr19_14583197_14584356   | pre-BCG1_v_pre-BCG7_down | -0,646723082 | 0,0424442   | 0,999994721 | 2397    | PTGER1   |  |
| chr19_34391316_34391731   | pre-BCG1_v_pre-BCG7_down | -1,191724455 | 0,017510171 | 0,999994721 | 102233  | KCTD15   |  |
| chr19_34391821_34392175   | pre-BCG1_v_pre-BCG7_down | -1,333760569 | 0,020529106 | 0,999994721 | 102707  | KCTD15   |  |
| chr19_41877729_41878637   | pre-BCG1_v_pre-BCG7_down | -0,724618447 | 0,001746396 | 0,999994721 | -3946   | TMEM91   |  |
| chr19_50418781_50420147   | pre-BCG1_v_pre-BCG7_down | -0,866652017 | 7,73E-06    | 0,150338015 | -12936  | ATF5     |  |

|                          |                          |              |             |             |         |                 |  |
|--------------------------|--------------------------|--------------|-------------|-------------|---------|-----------------|--|
| chr19_7450321_7450984    | pre-BCG1_v_pre-BCG7_down | -1,133122444 | 0,027813742 | 0,999994721 | 36805   | ENSG00000263264 |  |
| chr19_9362846_9363386    | pre-BCG1_v_pre-BCG7_down | -0,64667456  | 0,047818914 | 0,999994721 | 1510    | OR7E24          |  |
| chr2_132416089_132416758 | pre-BCG1_v_pre-BCG7_down | -0,671188751 | 0,014675765 | 0,999994721 | -166429 | MZT2A           |  |
| chr2_38600354_38601147   | pre-BCG1_v_pre-BCG7_down | -0,659593304 | 0,011498059 | 0,999994721 | 3653    | ATL2            |  |
| chr20_45097972_45098504  | pre-BCG1_v_pre-BCG7_down | -0,644586356 | 0,029180731 | 0,999994721 | 43955   | ZNF334          |  |
| chr20_60058430_60058967  | pre-BCG1_v_pre-BCG7_down | -0,589917859 | 0,029753883 | 0,999994721 | 231217  | CDH4            |  |
| chr22_10739623_10740127  | pre-BCG1_v_pre-BCG7_down | -1,214844819 | 0,018147771 | 0,999994721 | NONE    | NONE            |  |
| chr3_195540047_195540679 | pre-BCG1_v_pre-BCG7_down | -0,857411093 | 0,012256027 | 0,999994721 | -1215   | MUC4            |  |
| chr3_43996868_43997375   | pre-BCG1_v_pre-BCG7_down | -0,820227974 | 0,002891076 | 0,999994721 | 264760  | ABHD5           |  |
| chr4_114598892_114599748 | pre-BCG1_v_pre-BCG7_down | -0,956775355 | 0,000252984 | 0,81954027  | 82904   | CAMK2D          |  |
| chr6_38715073_38715534   | pre-BCG1_v_pre-BCG7_down | -0,733232054 | 0,006110365 | 0,999994721 | 24406   | DNAH8           |  |
| chr8_24293961_24294531   | pre-BCG1_v_pre-BCG7_down | -0,603682306 | 0,031733059 | 0,999994721 | -4293   | ADAM7           |  |
| chr9_130038378_130038894 | pre-BCG1_v_pre-BCG7_down | -0,642805347 | 0,025783826 | 0,999994721 | 11831   | GARNL3          |  |
| chr9_35728125_35729024   | pre-BCG1_v_pre-BCG7_down | -0,674004515 | 0,002669947 | 0,999994721 | -3757   | CREB3           |  |
| chr9_41229458_41230737   | pre-BCG1_v_pre-BCG7_down | -1,060673596 | 0,043559406 | 0,999994721 | 97266   | SPATA31A4       |  |
| chr1_157993429_157994057 | pre-BCG1_v_BCG9_up       | 0,696914991  | 0,002680689 | 0,242014136 | 30343   | KIRREL          |  |
| chr1_16623844_16624356   | pre-BCG1_v_BCG9_up       | 1,466729193  | 0,011485026 | 0,327924731 | 54849   | FBXO42          |  |
| chr1_16725115_16725553   | pre-BCG1_v_BCG9_up       | 1,303118063  | 0,038490456 | 0,433902916 | 38585   | SPATA21         |  |
| chr1_167439282_167439705 | pre-BCG1_v_BCG9_up       | 0,669323257  | 0,029654949 | 0,406580095 | 48281   | CD247           |  |
| chr1_247517760_247518647 | pre-BCG1_v_BCG9_up       | 0,64328358   | 0,003111115 | 0,247622157 | -23159  | ZNF496          |  |
| chr1_50023617_50024078   | pre-BCG1_v_BCG9_up       | 0,809239495  | 0,004900496 | 0,26789583  | 465737  | AGBL4           |  |
| chr1_52368383_52368812   | pre-BCG1_v_BCG9_up       | 0,714817508  | 0,01140199  | 0,326392462 | -24121  | NRD1            |  |
| chr1_6440247_6440965     | pre-BCG1_v_BCG9_up       | 0,661925934  | 0,017121536 | 0,357131651 | 5267    | ACOT7           |  |
| chr10_18140266_18140963  | pre-BCG1_v_BCG9_up       | 0,696448971  | 0,014760934 | 0,342969644 | 42263   | MRC1            |  |
| chr10_48523908_48524321  | pre-BCG1_v_BCG9_up       | 0,884174765  | 0,007464466 | 0,291925216 | -85139  | GDF10           |  |
| chr10_51074164_51075050  | pre-BCG1_v_BCG9_up       | 1,070598112  | 0,001037404 | 0,194978227 | 56108   | PARG            |  |
| chr10_69408912_69409384  | pre-BCG1_v_BCG9_up       | 0,604722225  | 0,005301692 | 0,26789583  | 46779   | CTNNA3          |  |
| chr10_76163_76791        | pre-BCG1_v_BCG9_up       | 0,597805161  | 0,001690453 | 0,206649859 | 18764   | TUBB8           |  |
| chr10_77636776_77638793  | pre-BCG1_v_BCG9_up       | 0,675603544  | 0,008593409 | 0,303691088 | 95266   | C10orf11        |  |
| chr10_93600817_93601603  | pre-BCG1_v_BCG9_up       | 0,720275938  | 0,011776204 | 0,327924731 | 43141   | TNKS2           |  |
| chr10_96374986_96375491  | pre-BCG1_v_BCG9_up       | 0,611816243  | 0,00999409  | 0,31586199  | -68139  | CYP2C18         |  |
| chr10_99536791_99537421  | pre-BCG1_v_BCG9_up       | 0,64714305   | 0,047965626 | 0,462208279 | -5397   | SFRP5           |  |

|                           |                    |             |             |             |         |           |     |
|---------------------------|--------------------|-------------|-------------|-------------|---------|-----------|-----|
| chr11_129375636_129376399 | pre-BCG1_v_BCG9_up | 0,809249811 | 0,039057075 | 0,436127427 | 130183  | BARX2     |     |
| chr11_57311205_57311772   | pre-BCG1_v_BCG9_up | 0,669137502 | 0,0044124   | 0,264296386 | 2510    | SMTNL1    |     |
| chr11_9091129_9091919     | pre-BCG1_v_BCG9_up | 0,593183795 | 0,01092102  | 0,324090769 | 21622   | SCUBE2    |     |
| chr12_108129230_108129631 | pre-BCG1_v_BCG9_up | 0,876948204 | 0,001463556 | 0,20205633  | 25506   | PRDM4     |     |
| chr12_120368678_120369627 | pre-BCG1_v_BCG9_up | 0,687052935 | 0,020597858 | 0,375283061 | -54058  | CIT       |     |
| chr12_203473_203985       | pre-BCG1_v_BCG9_up | 0,881814335 | 0,001923152 | 0,219884136 | 27798   | IQSEC3    |     |
| chr12_33439120_33439771   | pre-BCG1_v_BCG9_up | 0,738685843 | 0,01185274  | 0,328647216 | 153308  | SYT10     |     |
| chr12_553478_554415       | pre-BCG1_v_BCG9_up | 1,07821576  | 0,020982764 | 0,375283061 | -15583  | B4GALNT3  |     |
| chr12_9965209_9966762     | pre-BCG1_v_BCG9_up | 0,582169183 | 0,026797007 | 0,391619113 | -14091  | KLRF1     |     |
| chr13_36431427_36432649   | pre-BCG1_v_BCG9_up | 0,621170094 | 0,000491653 | 0,15927111  | 273405  | DCLK1     |     |
| chr13_36919663_36920530   | pre-BCG1_v_BCG9_up | 0,604666747 | 0,004740503 | 0,26789583  | 837     | SPG20     |     |
| chr14_24314661_24315492   | pre-BCG1_v_BCG9_up | 0,654575787 | 0,015510165 | 0,34738072  | -107718 | DHRS4     |     |
| chr15_20282402_20282955   | pre-BCG1_v_BCG9_up | 1,520223688 | 0,02040073  | 0,374620679 | NONE    | NONE      |     |
| chr15_20348867_20349764   | pre-BCG1_v_BCG9_up | 1,46919324  | 0,010630255 | 0,32138843  | NONE    | NONE      |     |
| chr15_51341595_51342117   | pre-BCG1_v_BCG9_up | 0,631708352 | 0,049777963 | 0,465008002 | 55617   | TNFAIP8L3 |     |
| chr15_67825416_67825995   | pre-BCG1_v_BCG9_up | 0,593717592 | 0,020727804 | 0,375283061 | -9341   | MAP2K5    |     |
| chr15_70853648_70854381   | pre-BCG1_v_BCG9_up | 0,787537646 | 0,003766888 | 0,264101006 | 201917  | UACA      |     |
| chr15_93072319_93073342   | pre-BCG1_v_BCG9_up | 0,608904603 | 0,023870548 | 0,381242269 | 126357  | FAM174B   |     |
| chr16_28505586_28508309   | pre-BCG1_v_BCG9_up | 0,621971477 | 0,02243421  | 0,375911088 | -93     | CLN3      |     |
| chr16_3112406_3113051     | pre-BCG1_v_BCG9_up | 0,716089086 | 0,002706427 | 0,24241855  | -2656   | IL32      | Yes |
| chr16_68356168_68356928   | pre-BCG1_v_BCG9_up | 0,621402042 | 0,042897326 | 0,447569633 | 11511   | PRMT7     |     |
| chr16_83968176_83968703   | pre-BCG1_v_BCG9_up | 0,605588733 | 0,023939651 | 0,381482232 | -14232  | OSGIN1    |     |
| chr17_32927753_32928522   | pre-BCG1_v_BCG9_up | 0,800033905 | 0,004281337 | 0,264296386 | 20370   | TMEM132E  |     |
| chr17_43231538_43232635   | pre-BCG1_v_BCG9_up | 0,824499503 | 0,015605312 | 0,34738072  | -5980   | HEXIM2    |     |
| chr17_44308153_44309186   | pre-BCG1_v_BCG9_up | 0,730001858 | 0,002421425 | 0,237208728 | -38504  | KANSL1    |     |
| chr17_44911270_44911728   | pre-BCG1_v_BCG9_up | 0,867666567 | 0,003057146 | 0,247622157 | -15373  | WNT3      |     |
| chr17_48576639_48577165   | pre-BCG1_v_BCG9_up | 0,785418302 | 0,025111638 | 0,384932891 | -8843   | MYCBPAP   |     |
| chr17_54900444_54900960   | pre-BCG1_v_BCG9_up | 0,774179569 | 0,003996913 | 0,264101006 | 10555   | C17orf67  |     |
| chr17_57833179_57833561   | pre-BCG1_v_BCG9_up | 0,614435985 | 0,014846127 | 0,34352877  | 48544   | VMP1      |     |
| chr17_74861124_74861929   | pre-BCG1_v_BCG9_up | 0,692798883 | 0,025832308 | 0,387850306 | -7202   | MGAT5B    |     |
| chr18_12777022_12777914   | pre-BCG1_v_BCG9_up | 0,59774619  | 0,025862555 | 0,387850306 | -74695  | CEP76     |     |
| chr18_28176755_28178224   | pre-BCG1_v_BCG9_up | 0,591838187 | 0,00145541  | 0,20205633  | 445217  | DSC3      |     |



|                          |                    |             |             |             |         |          |  |
|--------------------------|--------------------|-------------|-------------|-------------|---------|----------|--|
| chr18_5890697_5891242    | pre-BCG1_v_BCG9_up | 0,7488732   | 0,012392256 | 0,333977084 | 4984    | TMEM200C |  |
| chr19_1000174_1000965    | pre-BCG1_v_BCG9_up | 0,915505304 | 1,95E-05    | 0,037885069 | 152     | GRIN3B   |  |
| chr19_17794772_17795540  | pre-BCG1_v_BCG9_up | 0,765614172 | 0,022517013 | 0,37611534  | 3852    | UNC13A   |  |
| chr19_18789874_18790435  | pre-BCG1_v_BCG9_up | 0,655269743 | 0,046525222 | 0,457647131 | -4333   | CRTC1    |  |
| chr19_19224765_19225533  | pre-BCG1_v_BCG9_up | 0,591169806 | 0,003067576 | 0,247622157 | 24153   | TMEM161A |  |
| chr19_22421606_22422542  | pre-BCG1_v_BCG9_up | 0,929597002 | 0,033701486 | 0,422463275 | -42321  | ZNF676   |  |
| chr19_2720891_2721772    | pre-BCG1_v_BCG9_up | 0,6207245   | 0,001838641 | 0,212724142 | 84      | DIRAS1   |  |
| chr19_35040686_35041398  | pre-BCG1_v_BCG9_up | 0,628484742 | 0,009191411 | 0,308925674 | 68499   | WTIP     |  |
| chr19_3576422_3577238    | pre-BCG1_v_BCG9_up | 0,72403725  | 0,001309749 | 0,20205633  | 3894    | HMG20B   |  |
| chr19_37817138_37817866  | pre-BCG1_v_BCG9_up | 0,806825085 | 0,024553392 | 0,384016298 | -8078   | HKR1     |  |
| chr19_44808740_44809365  | pre-BCG1_v_BCG9_up | 0,628527922 | 0,024096132 | 0,382253164 | 125     | ZNF235   |  |
| chr19_53979761_53980566  | pre-BCG1_v_BCG9_up | 0,596906904 | 0,023298467 | 0,380061443 | 9175    | ZNF813   |  |
| chr19_53982086_53983094  | pre-BCG1_v_BCG9_up | 0,5812511   | 0,001131143 | 0,201706747 | 11601   | ZNF813   |  |
| chr19_7917319_7918073    | pre-BCG1_v_BCG9_up | 0,590539367 | 0,019537726 | 0,372673973 | 6267    | EVI5L    |  |
| chr2_127422914_127423866 | pre-BCG1_v_BCG9_up | 0,62860734  | 0,006245432 | 0,275891965 | 9881    | GYPC     |  |
| chr2_127674657_127675223 | pre-BCG1_v_BCG9_up | 0,581170943 | 0,034744697 | 0,426985488 | 189991  | BIN1     |  |
| chr2_143936841_143937586 | pre-BCG1_v_BCG9_up | 0,65935479  | 0,015524896 | 0,34738072  | 50331   | ARHGAP15 |  |
| chr2_149038517_149039089 | pre-BCG1_v_BCG9_up | 0,726993363 | 0,01559817  | 0,34738072  | 260223  | MBD5     |  |
| chr2_176122575_176123082 | pre-BCG1_v_BCG9_up | 0,765413875 | 0,000875083 | 0,183834761 | -73494  | ATP5G3   |  |
| chr2_207681283_207681814 | pre-BCG1_v_BCG9_up | 0,756932957 | 0,048970717 | 0,464936962 | -51278  | MDH1B    |  |
| chr2_23386424_23387052   | pre-BCG1_v_BCG9_up | 0,709027327 | 0,032961634 | 0,420390092 | -221350 | KLHL29   |  |
| chr2_45169015_45169979   | pre-BCG1_v_BCG9_up | 0,590456205 | 0,046787605 | 0,457781598 | 595     | SIX3     |  |
| chr2_66445405_66446591   | pre-BCG1_v_BCG9_up | 0,62664198  | 0,005421537 | 0,26789583  | -216534 | MEIS1    |  |
| chr2_88452012_88452886   | pre-BCG1_v_BCG9_up | 0,643657594 | 0,010211674 | 0,320327238 | -18530  | THNSL2   |  |
| chr20_32031166_32031739  | pre-BCG1_v_BCG9_up | 0,702688365 | 0,015524423 | 0,34738072  | 245     | SNTA1    |  |
| chr20_6122549_6123226    | pre-BCG1_v_BCG9_up | 0,655804028 | 0,001597815 | 0,204320535 | -18697  | FERMT1   |  |
| chr21_10327772_10328209  | pre-BCG1_v_BCG9_up | 1,072454777 | 0,026678946 | 0,391466617 | 662891  | TPTE     |  |
| chr21_10355286_10355883  | pre-BCG1_v_BCG9_up | 1,375486898 | 0,013706235 | 0,335128206 | 635297  | TPTE     |  |
| chr21_14063558_14064997  | pre-BCG1_v_BCG9_up | 1,315132933 | 0,030025485 | 0,407545632 | -918220 | POTED    |  |
| chr21_33027133_33027801  | pre-BCG1_v_BCG9_up | 0,662908488 | 0,047562153 | 0,461310162 | -4468   | SOD1     |  |
| chr21_41316555_41317477  | pre-BCG1_v_BCG9_up | 1,089057429 | 0,000832501 | 0,183834761 | 77773   | PCP4     |  |
| chr21_8234012_8234860    | pre-BCG1_v_BCG9_up | 1,124627571 | 0,031807823 | 0,415644346 | NONE    | NONE     |  |

|                          |                    |             |             |             |         |          |  |
|--------------------------|--------------------|-------------|-------------|-------------|---------|----------|--|
| chr22_10731220_10731692  | pre-BCG1_v_BCG9_up | 1,596988656 | 0,011732325 | 0,327924731 | NONE    | NONE     |  |
| chr22_19760571_19761219  | pre-BCG1_v_BCG9_up | 0,604852454 | 0,017920949 | 0,363081267 | 16669   | TBX1     |  |
| chr22_29314846_29315812  | pre-BCG1_v_BCG9_up | 0,627719164 | 0,005893984 | 0,270438199 | 35749   | ZNRF3    |  |
| chr3_127915089_127915604 | pre-BCG1_v_BCG9_up | 0,901281312 | 0,00289325  | 0,244645504 | 43050   | EEFSEC   |  |
| chr3_129343844_129344505 | pre-BCG1_v_BCG9_up | 0,587395417 | 0,020757667 | 0,375283061 | -18514  | PLXND1   |  |
| chr3_130093960_130094722 | pre-BCG1_v_BCG9_up | 0,727586564 | 0,002347473 | 0,237208728 | 29982   | COL6A5   |  |
| chr3_134374020_134374815 | pre-BCG1_v_BCG9_up | 0,607017141 | 0,023845731 | 0,381159114 | -4554   | KY       |  |
| chr3_139934997_139935443 | pre-BCG1_v_BCG9_up | 0,642974065 | 0,024902901 | 0,384040277 | 281193  | CLSTN2   |  |
| chr3_141051071_141051620 | pre-BCG1_v_BCG9_up | 0,728896553 | 0,023231625 | 0,380061443 | -55308  | ZBTB38   |  |
| chr3_30894470_30894938   | pre-BCG1_v_BCG9_up | 0,687648774 | 0,00592483  | 0,270438199 | 41553   | GADL1    |  |
| chr3_43995119_43995603   | pre-BCG1_v_BCG9_up | 0,6645682   | 0,025248709 | 0,386159097 | 262999  | ABHD5    |  |
| chr3_46565820_46566396   | pre-BCG1_v_BCG9_up | 0,688428293 | 0,015788242 | 0,348936879 | 27127   | RTP3     |  |
| chr3_53494172_53494923   | pre-BCG1_v_BCG9_up | 0,601742586 | 0,010599033 | 0,32138843  | -34528  | CACNA1D  |  |
| chr3_9916678_9917495     | pre-BCG1_v_BCG9_up | 0,794472756 | 0,000527765 | 0,165454372 | 3108    | CIDEC    |  |
| chr4_118033227_118033849 | pre-BCG1_v_BCG9_up | 0,580366785 | 0,03786915  | 0,433147183 | -26802  | TRAM1L1  |  |
| chr4_182448678_182449338 | pre-BCG1_v_BCG9_up | 0,620179297 | 0,03795948  | 0,433147183 | -715574 | TENM3    |  |
| chr4_61200308_61201490   | pre-BCG1_v_BCG9_up | 0,752711427 | 0,000591506 | 0,174952403 | -866961 | LPHN3    |  |
| chr4_82561577_82562345   | pre-BCG1_v_BCG9_up | 0,676972293 | 0,00140907  | 0,20205633  | -168892 | RASGEF1B |  |
| chr4_8269566_8270406     | pre-BCG1_v_BCG9_up | 0,586413764 | 0,019317851 | 0,371763444 | -1506   | HTRA3    |  |
| chr5_120465493_120465806 | pre-BCG1_v_BCG9_up | 0,703946965 | 0,028883124 | 0,40407839  | 665631  | PRR16    |  |
| chr5_135578638_135579241 | pre-BCG1_v_BCG9_up | 0,581065943 | 0,048632436 | 0,464076546 | 110404  | SMAD5    |  |
| chr5_147509584_147510161 | pre-BCG1_v_BCG9_up | 0,837101693 | 0,023093127 | 0,380061443 | -39423  | SPINK14  |  |
| chr5_179343933_179345711 | pre-BCG1_v_BCG9_up | 0,724076599 | 0,0107685   | 0,32400516  | -9963   | TBC1D9B  |  |
| chr5_55176249_55176797   | pre-BCG1_v_BCG9_up | 0,635597392 | 0,045222217 | 0,453852092 | 29189   | IL31RA   |  |
| chr5_88680214_88680682   | pre-BCG1_v_BCG9_up | 0,75692087  | 0,000662442 | 0,180466765 | -480549 | MEF2C    |  |
| chr6_104941012_104941716 | pre-BCG1_v_BCG9_up | 0,628347827 | 0,004613939 | 0,26789583  | 366430  | HACE1    |  |
| chr6_147508112_147508790 | pre-BCG1_v_BCG9_up | 0,637603366 | 0,04087647  | 0,442075782 | -17218  | STXBPS   |  |
| chr6_151325412_151325883 | pre-BCG1_v_BCG9_up | 0,651859948 | 0,029581631 | 0,406580095 | 138963  | MTHFD1L  |  |
| chr6_159168949_159170125 | pre-BCG1_v_BCG9_up | 0,722453195 | 0,000644356 | 0,180466765 | 70907   | EZR      |  |
| chr7_102279639_102280821 | pre-BCG1_v_BCG9_up | 0,663762491 | 0,018657892 | 0,369928459 | 3008    | UPK3BL   |  |
| chr7_116671796_116672546 | pre-BCG1_v_BCG9_up | 0,646015598 | 0,001942548 | 0,22080295  | 78790   | ST7      |  |
| chr7_130491112_130491571 | pre-BCG1_v_BCG9_up | 0,745652916 | 0,006499564 | 0,28068943  | -72454  | KLF14    |  |

|                          |                      |              |             |             |        |          |  |
|--------------------------|----------------------|--------------|-------------|-------------|--------|----------|--|
| chr7_130491941_130492469 | pre-BCG1_v_BCG9_up   | 0,84489264   | 0,004879805 | 0,26789583  | -73317 | KLF14    |  |
| chr7_20786734_20787201   | pre-BCG1_v_BCG9_up   | 0,637094634  | 0,030901736 | 0,412221444 | 39537  | SP8      |  |
| chr7_21542834_21543348   | pre-BCG1_v_BCG9_up   | 0,626185715  | 0,003583466 | 0,264101006 | -39742 | DNAH11   |  |
| chr7_33904448_33905202   | pre-BCG1_v_BCG9_up   | 0,643791831  | 0,030802065 | 0,411908982 | -39698 | BMPER    |  |
| chr7_35971340_35971856   | pre-BCG1_v_BCG9_up   | 0,645722934  | 0,048458775 | 0,463839356 | 130971 | SEPT7    |  |
| chr7_38630698_38631640   | pre-BCG1_v_BCG9_up   | 0,682129889  | 0,004535333 | 0,266324081 | 39998  | AMPH     |  |
| chr7_64463539_64464431   | pre-BCG1_v_BCG9_up   | 0,630761844  | 0,017399399 | 0,358634266 | 3046   | ERV3-1   |  |
| chr7_6526535_6527062     | pre-BCG1_v_BCG9_up   | 0,88590328   | 0,000258877 | 0,10938679  | -2926  | KDELR2   |  |
| chr7_82443268_82443808   | pre-BCG1_v_BCG9_up   | 0,591024602  | 0,044028786 | 0,449946482 | 348708 | PCLO     |  |
| chr8_103501338_103501855 | pre-BCG1_v_BCG9_up   | 0,667993108  | 0,037886527 | 0,433147183 | -62203 | ODF1     |  |
| chr8_141366083_141367236 | pre-BCG1_v_BCG9_up   | 0,598766793  | 0,033286019 | 0,420390092 | 102018 | TRAPPC9  |  |
| chr8_21787326_21788103   | pre-BCG1_v_BCG9_up   | 0,589655644  | 0,029141762 | 0,405170543 | 10533  | XPO7     |  |
| chr8_76677782_76678320   | pre-BCG1_v_BCG9_up   | 0,762649013  | 0,002873563 | 0,244645504 | 225947 | HNF4G    |  |
| chr9_113154430_113154996 | pre-BCG1_v_BCG9_up   | 0,678113351  | 0,017622434 | 0,360554994 | -54625 | TXNDC8   |  |
| chr9_121599254_121599823 | pre-BCG1_v_BCG9_up   | 0,628292951  | 0,021876158 | 0,375283061 | 532206 | BRINP1   |  |
| chr9_121736375_121736868 | pre-BCG1_v_BCG9_up   | 0,838147983  | 0,004027901 | 0,264296386 | 395123 | BRINP1   |  |
| chr9_130938798_130939748 | pre-BCG1_v_BCG9_up   | 0,605288038  | 0,026837987 | 0,391790751 | 16734  | C9orf16  |  |
| chr9_137053642_137054370 | pre-BCG1_v_BCG9_up   | 0,654073889  | 0,018884275 | 0,369928459 | 52796  | WDR5     |  |
| chr9_4490073_4491116     | pre-BCG1_v_BCG9_up   | 1,041047554  | 0,000687068 | 0,180466765 | 151    | SLC1A1   |  |
| chr9_8857297_8858141     | pre-BCG1_v_BCG9_up   | 0,669988044  | 0,005019625 | 0,26789583  | NONE   | NONE     |  |
| chr9_93131329_93131827   | pre-BCG1_v_BCG9_up   | 0,817309674  | 0,009981916 | 0,31586199  | 273808 | DIRAS2   |  |
| chr9_97848484_97849321   | pre-BCG1_v_BCG9_up   | 0,631771814  | 0,006825443 | 0,284780812 | 231081 | FANCC    |  |
| chrX_65407078_65407688   | pre-BCG1_v_BCG9_up   | 1,29251962   | 1,61E-05    | 0,037885069 | 24992  | HEPH     |  |
| chrY_11307334_11308401   | pre-BCG1_v_BCG9_up   | 1,346524165  | 0,014501798 | 0,340895802 | NONE   | NONE     |  |
| chrY_11322380_11322990   | pre-BCG1_v_BCG9_up   | 1,208813916  | 0,040049872 | 0,440548595 | NONE   | NONE     |  |
| chrY_11331928_11334400   | pre-BCG1_v_BCG9_up   | 1,110976485  | 0,033935189 | 0,423906348 | NONE   | NONE     |  |
| chrY_56850100_56851308   | pre-BCG1_v_BCG9_up   | 1,094258712  | 0,028958355 | 0,404355991 | NONE   | NONE     |  |
| chrY_56855130_56856102   | pre-BCG1_v_BCG9_up   | 1,224352727  | 0,019675992 | 0,374209644 | NONE   | NONE     |  |
| chr1_158830992_158837305 | pre-BCG1_v_BCG9_down | -1,005472938 | 0,000826299 | 0,183834761 | 33042  | MNDA     |  |
| chr1_158930786_158934314 | pre-BCG1_v_BCG9_down | -0,888955163 | 0,000867255 | 0,183834761 | 31208  | PYHIN1   |  |
| chr1_16514553_16514998   | pre-BCG1_v_BCG9_down | -0,686907861 | 0,003234611 | 0,250482609 | 24328  | ARHGEF19 |  |
| chr1_169584731_169585422 | pre-BCG1_v_BCG9_down | -1,008851354 | 0,000200917 | 0,092283586 | 14273  | SELP     |  |

|                           |                      |              |             |             |         |           |  |
|---------------------------|----------------------|--------------|-------------|-------------|---------|-----------|--|
| chr1_192158370_192161157  | pre-BCG1_v_BCG9_down | -1,087905639 | 0,000293885 | 0,11900522  | 32177   | RGS18     |  |
| chr1_198638405_198644441  | pre-BCG1_v_BCG9_down | -0,977196085 | 0,000626305 | 0,179021931 | 33253   | PTPRC     |  |
| chr1_241531388_241532998  | pre-BCG1_v_BCG9_down | -0,658361993 | 8,76E-05    | 0,061244017 | -11663  | RGS7      |  |
| chr1_245953572_245954431  | pre-BCG1_v_BCG9_down | -0,944227794 | 6,91E-05    | 0,053743783 | 635715  | KIF26B    |  |
| chr1_44730816_44731405    | pre-BCG1_v_BCG9_down | -0,667614992 | 0,00781591  | 0,294608417 | 51948   | DMAP1     |  |
| chr1_78003996_78005999    | pre-BCG1_v_BCG9_down | -0,622532517 | 0,000459754 | 0,154073039 | 143345  | ZZZ3      |  |
| chr1_84144173_84146537    | pre-BCG1_v_BCG9_down | -1,18962894  | 5,22E-05    | 0,049776798 | 319460  | TTLL7     |  |
| chr1_89069767_89070467    | pre-BCG1_v_BCG9_down | -0,667801267 | 0,007708476 | 0,29374227  | -79788  | PKN2      |  |
| chr10_133278153_133278741 | pre-BCG1_v_BCG9_down | -0,631809158 | 0,017391345 | 0,358634266 | -469508 | PPP2R2D   |  |
| chr10_3828579_3829322     | pre-BCG1_v_BCG9_down | -0,657185768 | 0,0127841   | 0,334936875 | -1484   | KLF6      |  |
| chr10_63264732_63269666   | pre-BCG1_v_BCG9_down | -0,722467206 | 0,000594066 | 0,174952403 | -53991  | TMEM26    |  |
| chr11_66100522_66101122   | pre-BCG1_v_BCG9_down | -0,581296235 | 0,049934861 | 0,465008002 | 3178    | RIN1      |  |
| chr12_10386640_10390138   | pre-BCG1_v_BCG9_down | -1,284012033 | 4,15E-05    | 0,044708307 | 22985   | GABARAPL1 |  |
| chr12_10407631_10409685   | pre-BCG1_v_BCG9_down | -0,646779721 | 0,004169511 | 0,264296386 | 43254   | GABARAPL1 |  |
| chr12_118358663_118359778 | pre-BCG1_v_BCG9_down | -0,992610273 | 0,00017394  | 0,087424315 | 47567   | KSR2      |  |
| chr12_123075234_123076132 | pre-BCG1_v_BCG9_down | -0,737987159 | 0,005688876 | 0,270438199 | 63888   | KNTC1     |  |
| chr12_14385600_14386559   | pre-BCG1_v_BCG9_down | -1,441325756 | 4,37E-05    | 0,044708307 | -132536 | ATF7IP    |  |
| chr12_57768905_57770049   | pre-BCG1_v_BCG9_down | -2,205469694 | 0,005650127 | 0,270438199 | 55311   | R3HDM2    |  |
| chr12_57771011_57771402   | pre-BCG1_v_BCG9_down | -1,845770782 | 0,019279017 | 0,371579305 | 53581   | R3HDM2    |  |
| chr12_68158844_68159804   | pre-BCG1_v_BCG9_down | -0,751003093 | 0,027173491 | 0,394186417 | 116823  | DYRK2     |  |
| chr12_8513426_8514868     | pre-BCG1_v_BCG9_down | -0,934675453 | 0,000900626 | 0,183834761 | -94375  | CLEC6A    |  |
| chr12_8989434_8991604     | pre-BCG1_v_BCG9_down | -0,920820825 | 0,000403518 | 0,140056889 | 15451   | A2ML1     |  |
| chr12_9827324_9830544     | pre-BCG1_v_BCG9_down | -0,700076469 | 0,011387473 | 0,326392462 | 6625    | CLEC2D    |  |
| chr12_9864997_9870634     | pre-BCG1_v_BCG9_down | -0,819628686 | 4,00E-05    | 0,044708307 | 18079   | CLECL1    |  |
| chr13_40978878_40983360   | pre-BCG1_v_BCG9_down | -0,633897378 | 0,002339089 | 0,237208728 | 259615  | FOXO1     |  |
| chr13_41016040_41019586   | pre-BCG1_v_BCG9_down | -0,715707753 | 0,000116101 | 0,073766482 | 222921  | FOXO1     |  |
| chr13_49109963_49111218   | pre-BCG1_v_BCG9_down | -0,684627304 | 0,010621443 | 0,32138843  | -3222   | RCBTB2    |  |
| chr13_99256598_99259125   | pre-BCG1_v_BCG9_down | -0,899393353 | 5,78E-06    | 0,02808669  | -83610  | STK24     |  |
| chr14_60184086_60184518   | pre-BCG1_v_BCG9_down | -0,609980056 | 0,013189727 | 0,335128206 | 153382  | RTN1      |  |
| chr14_88004823_88007605   | pre-BCG1_v_BCG9_down | -0,662328417 | 3,75E-06    | 0,024327429 | 453401  | GALC      |  |
| chr17_31317766_31321936   | pre-BCG1_v_BCG9_down | -0,731052707 | 0,000686461 | 0,180466765 | 964     | SPACA3    |  |
| chr17_46361441_46361887   | pre-BCG1_v_BCG9_down | -0,746483283 | 0,00490629  | 0,26789583  | 145888  | SKAP1     |  |

|                          |                      |              |             |             |         |          |  |
|--------------------------|----------------------|--------------|-------------|-------------|---------|----------|--|
| chr18_2980276_2982873    | pre-BCG1_v_BCG9_down | -0,585071976 | 0,003941198 | 0,264101006 | 30370   | LPIN2    |  |
| chr2_119929630_119931996 | pre-BCG1_v_BCG9_down | -1,232944842 | 3,33E-05    | 0,044708307 | -14348  | C1QL2    |  |
| chr2_142877514_142879767 | pre-BCG1_v_BCG9_down | -0,81069971  | 0,000869498 | 0,183834761 | 10629   | LRP1B    |  |
| chr2_143128594_143130833 | pre-BCG1_v_BCG9_down | -1,182886117 | 4,34E-05    | 0,044708307 | -240444 | LRP1B    |  |
| chr2_157435848_157436462 | pre-BCG1_v_BCG9_down | -0,707536247 | 0,013776171 | 0,335128206 | 144202  | GPD2     |  |
| chr2_159515626_159516942 | pre-BCG1_v_BCG9_down | -0,735762245 | 5,38E-05    | 0,049776798 | -135545 | DAPL1    |  |
| chr2_191148769_191149446 | pre-BCG1_v_BCG9_down | -1,027011355 | 0,001639788 | 0,204647596 | 35663   | HIBCH    |  |
| chr2_213149684_213150692 | pre-BCG1_v_BCG9_down | -0,583018632 | 0,024454166 | 0,384016298 | 253377  | ERBB4    |  |
| chr2_38600354_38601147   | pre-BCG1_v_BCG9_down | -0,620559337 | 0,020050312 | 0,3743268   | 3653    | ATL2     |  |
| chr2_71417000_71417726   | pre-BCG1_v_BCG9_down | -0,626200131 | 0,003366608 | 0,255079978 | 36850   | PAIP2B   |  |
| chr2_98660684_98663507   | pre-BCG1_v_BCG9_down | -0,667333981 | 0,033440961 | 0,421346713 | -41559  | VWA3B    |  |
| chr21_14543894_14546545  | pre-BCG1_v_BCG9_down | -1,135198724 | 0,000617716 | 0,179021931 | -437278 | POTED    |  |
| chr21_24428544_24429525  | pre-BCG1_v_BCG9_down | -0,598169548 | 0,002268601 | 0,235801044 | NONE    | NONE     |  |
| chr3_108822618_108825023 | pre-BCG1_v_BCG9_down | -0,623638668 | 0,040083369 | 0,440667668 | 13168   | MORC1    |  |
| chr3_151201296_151203233 | pre-BCG1_v_BCG9_down | -0,610098525 | 0,015227304 | 0,346550342 | -25768  | IGSF10   |  |
| chr3_152243322_152246923 | pre-BCG1_v_BCG9_down | -0,944695241 | 4,27E-05    | 0,044708307 | -186344 | TMEM14E  |  |
| chr3_16888067_16889077   | pre-BCG1_v_BCG9_down | -0,674705656 | 0,01294649  | 0,335128206 | -37880  | PLCL2    |  |
| chr3_28292893_28294004   | pre-BCG1_v_BCG9_down | -0,767515595 | 0,002352496 | 0,237208728 | 10363   | CMC1     |  |
| chr4_147057356_147057873 | pre-BCG1_v_BCG9_down | -0,706427831 | 0,006373483 | 0,278385166 | -39266  | LSM6     |  |
| chr4_39030525_39032408   | pre-BCG1_v_BCG9_down | -0,94485086  | 4,23E-05    | 0,044708307 | 2574    | TMEM156  |  |
| chr5_58491289_58493150   | pre-BCG1_v_BCG9_down | -0,94110653  | 0,000720142 | 0,181618481 | 613353  | RAB3C    |  |
| chr5_95080139_95081875   | pre-BCG1_v_BCG9_down | -0,645728733 | 9,14E-05    | 0,061244017 | 14128   | RHOBTB3  |  |
| chr5_96896313_96896924   | pre-BCG1_v_BCG9_down | -0,825441519 | 0,001528131 | 0,20205633  | -377655 | RIOK2    |  |
| chr6_127899285_127901264 | pre-BCG1_v_BCG9_down | -0,775104355 | 0,001325887 | 0,20205633  | 1956    | C6orf58  |  |
| chr6_156781504_156782711 | pre-BCG1_v_BCG9_down | -1,278193158 | 1,27E-05    | 0,037885069 | -316955 | ARID1B   |  |
| chr6_158649979_158651155 | pre-BCG1_v_BCG9_down | -0,649509238 | 0,005124786 | 0,26789583  | 61183   | GTF2H5   |  |
| chr7_116027824_116031041 | pre-BCG1_v_BCG9_down | -0,657606305 | 0,007801748 | 0,294608417 | -110011 | CAV2     |  |
| chr7_148962607_148964251 | pre-BCG1_v_BCG9_down | -0,636625086 | 3,58E-05    | 0,044708307 | 4167    | ZNF783   |  |
| chr7_33039359_33040256   | pre-BCG1_v_BCG9_down | -0,791493562 | 0,00285903  | 0,244645504 | 42791   | FKBP9    |  |
| chr7_38250186_38251605   | pre-BCG1_v_BCG9_down | -1,204282607 | 0,003985543 | 0,264101006 | 33072   | STARD3NL |  |
| chr7_38251676_38253400   | pre-BCG1_v_BCG9_down | -0,79144902  | 0,024428606 | 0,384016298 | 34714   | STARD3NL |  |
| chr7_38332375_38336911   | pre-BCG1_v_BCG9_down | -0,626278968 | 0,001668702 | 0,206589598 | 116819  | STARD3NL |  |

|                           |                         |              |             |             |         |          |     |
|---------------------------|-------------------------|--------------|-------------|-------------|---------|----------|-----|
| chr7_80638066_80642175    | pre-BCG1_v_BCG9_down    | -1,012602461 | 0,000907966 | 0,183834761 | -91454  | SEMA3C   |     |
| chr9_121121259_121122937  | pre-BCG1_v_BCG9_down    | -0,656774721 | 0,001496268 | 0,20205633  | 655448  | TLR4     |     |
| chr9_122900911_122901710  | pre-BCG1_v_BCG9_down    | -1,323583055 | 1,93E-05    | 0,037885069 | 441125  | CDK5RAP2 |     |
| chr9_36143729_36145208    | pre-BCG1_v_BCG9_down    | -0,67990964  | 0,000300583 | 0,119233323 | 7727    | GLIPR2   |     |
| chrX_79144638_79147652    | pre-BCG1_v_BCG9_down    | -0,818285055 | 0,002161955 | 0,230639024 | -131596 | TBX22    |     |
| chr1_159945492_159946025  | pre-BCG1_v_pre-BCG10_up | 0,599766636  | 0,03209691  | 0,62614993  | -21715  | SLAMF9   |     |
| chr1_239386557_239387345  | pre-BCG1_v_pre-BCG10_up | 0,714345994  | 0,000936275 | 0,544998581 | -405422 | CHRM3    |     |
| chr1_247517760_247518647  | pre-BCG1_v_pre-BCG10_up | 0,693538699  | 0,002543117 | 0,548740748 | -23159  | ZNF496   |     |
| chr1_46203088_46203819    | pre-BCG1_v_pre-BCG10_up | 0,613732358  | 0,000470679 | 0,508254413 | 12867   | IPP      |     |
| chr1_6440247_6440965      | pre-BCG1_v_pre-BCG10_up | 0,734187564  | 0,011547996 | 0,58050417  | 5267    | ACOT7    |     |
| chr1_66751932_66752852    | pre-BCG1_v_pre-BCG10_up | 0,606981058  | 0,002828448 | 0,548740748 | -247573 | SGIP1    |     |
| chr1_85576536_85577452    | pre-BCG1_v_pre-BCG10_up | 0,655845049  | 0,002426532 | 0,544998581 | 48990   | WDR63    |     |
| chr10_13891394_13892137   | pre-BCG1_v_pre-BCG10_up | 0,676195399  | 0,030766331 | 0,623045375 | 262839  | PRPF18   |     |
| chr10_18140266_18140963   | pre-BCG1_v_pre-BCG10_up | 0,608992923  | 0,043435039 | 0,644410661 | 42263   | MRC1     |     |
| chr10_26391595_26392685   | pre-BCG1_v_pre-BCG10_up | 0,589421725  | 0,008759807 | 0,548740748 | -113096 | GAD2     |     |
| chr10_48523908_48524321   | pre-BCG1_v_pre-BCG10_up | 0,913121803  | 0,008657688 | 0,548740748 | -85139  | GDF10    |     |
| chr10_51074164_51075050   | pre-BCG1_v_pre-BCG10_up | 0,778980423  | 0,022794524 | 0,599856373 | 56108   | PARG     |     |
| chr10_77636776_77638793   | pre-BCG1_v_pre-BCG10_up | 0,762577172  | 0,004933595 | 0,548740748 | 95266   | C10orf11 |     |
| chr10_93600817_93601603   | pre-BCG1_v_pre-BCG10_up | 0,773266827  | 0,010191534 | 0,571815561 | 43141   | TNKS2    |     |
| chr10_99536791_99537421   | pre-BCG1_v_pre-BCG10_up | 0,761423888  | 0,026562141 | 0,604315032 | -5397   | SFRP5    |     |
| chr11_111512299_111512995 | pre-BCG1_v_pre-BCG10_up | 0,614746898  | 0,008608361 | 0,548740748 | 39532   | SIK2     |     |
| chr11_117186147_117187417 | pre-BCG1_v_pre-BCG10_up | 0,914102579  | 0,003393023 | 0,548740748 | 190     | BACE1    |     |
| chr11_118621218_118621750 | pre-BCG1_v_pre-BCG10_up | 0,645311212  | 0,025950607 | 0,60063625  | 40361   | DDX6     |     |
| chr11_129375636_129376399 | pre-BCG1_v_pre-BCG10_up | 1,063460078  | 0,00940657  | 0,552373103 | 130183  | BARX2    |     |
| chr11_46277608_46278138   | pre-BCG1_v_pre-BCG10_up | 1,032780291  | 0,00715079  | 0,548740748 | -21339  | CREB3L1  |     |
| chr11_72589953_72590556   | pre-BCG1_v_pre-BCG10_up | 0,686115477  | 0,0366869   | 0,627714142 | 64902   | ATG16L2  | Yes |
| chr11_9091129_9091919     | pre-BCG1_v_pre-BCG10_up | 0,682012912  | 0,005419495 | 0,548740748 | 21622   | SCUBE2   |     |
| chr11_94740503_94741257   | pre-BCG1_v_pre-BCG10_up | 0,733804523  | 0,000681149 | 0,544998581 | -17542  | KDM4E    | Yes |
| chr12_125186183_125186787 | pre-BCG1_v_pre-BCG10_up | 0,654285814  | 0,026638806 | 0,604315032 | 161908  | SCARB1   |     |
| chr12_14216420_14217014   | pre-BCG1_v_pre-BCG10_up | 0,587072436  | 0,048509191 | 0,649412094 | -83664  | GRIN2B   |     |
| chr12_33439120_33439771   | pre-BCG1_v_pre-BCG10_up | 0,826087165  | 0,007414729 | 0,548740748 | 153308  | SYT10    |     |
| chr12_55681472_55682478   | pre-BCG1_v_pre-BCG10_up | 0,830076471  | 0,020919145 | 0,595272408 | 7041    | OR6C6    |     |

|                         |                         |             |             |             |         |          |     |
|-------------------------|-------------------------|-------------|-------------|-------------|---------|----------|-----|
| chr12_58920109_58920638 | pre-BCG1_v_pre-BCG10_up | 0,980021901 | 0,007102775 | 0,548740748 | 393929  | LRIG3    |     |
| chr12_77324798_77325271 | pre-BCG1_v_pre-BCG10_up | 0,788325855 | 0,017852725 | 0,594721648 | -52195  | CSRP2    |     |
| chr12_88579703_88580716 | pre-BCG1_v_pre-BCG10_up | 0,682296286 | 0,001843994 | 0,544998581 | 44137   | TMTC3    |     |
| chr13_36919663_36920530 | pre-BCG1_v_pre-BCG10_up | 0,640752542 | 0,004455649 | 0,548740748 | 837     | SPG20    |     |
| chr14_88322950_88323848 | pre-BCG1_v_pre-BCG10_up | 0,590380833 | 0,039049434 | 0,635425224 | 136216  | GALC     |     |
| chr15_29821480_29822596 | pre-BCG1_v_pre-BCG10_up | 0,61923345  | 0,004616746 | 0,548740748 | 40889   | FAM189A1 |     |
| chr15_51093837_51095099 | pre-BCG1_v_pre-BCG10_up | 0,776856216 | 0,00045586  | 0,508254413 | -36463  | SPPL2A   |     |
| chr15_68781658_68782061 | pre-BCG1_v_pre-BCG10_up | 0,601982932 | 0,04573435  | 0,644410661 | -57368  | ITGA11   |     |
| chr15_93072319_93073342 | pre-BCG1_v_pre-BCG10_up | 0,580935315 | 0,040905809 | 0,640955277 | 126357  | FAM174B  |     |
| chr16_28505586_28508309 | pre-BCG1_v_pre-BCG10_up | 0,692492995 | 0,015723742 | 0,594721648 | -93     | CLN3     |     |
| chr16_3112406_3113051   | pre-BCG1_v_pre-BCG10_up | 0,62487336  | 0,01372673  | 0,593059077 | -2656   | IL32     | Yes |
| chr16_3364992_3365653   | pre-BCG1_v_pre-BCG10_up | 0,629562943 | 0,019893063 | 0,594721648 | -9678   | TIGD7    |     |
| chr16_57998320_57999172 | pre-BCG1_v_pre-BCG10_up | 0,821878644 | 0,001850081 | 0,544998581 | 6270    | CNGB1    |     |
| chr16_66517060_66517572 | pre-BCG1_v_pre-BCG10_up | 0,727188274 | 0,017830062 | 0,594721648 | 56116   | BEAN1    |     |
| chr16_66578946_66579630 | pre-BCG1_v_pre-BCG10_up | 0,702035549 | 0,012911627 | 0,586843988 | 5027    | TK2      |     |
| chr16_83968176_83968703 | pre-BCG1_v_pre-BCG10_up | 0,59445605  | 0,03642109  | 0,626474973 | -14232  | OSGIN1   |     |
| chr16_85169302_85169957 | pre-BCG1_v_pre-BCG10_up | 0,638125394 | 0,023936899 | 0,60063625  | -23516  | FAM92B   |     |
| chr16_87945228_87945849 | pre-BCG1_v_pre-BCG10_up | 0,623762473 | 0,012506126 | 0,584685955 | 24583   | CA5A     |     |
| chr17_19579663_19580481 | pre-BCG1_v_pre-BCG10_up | 0,674243969 | 0,022639442 | 0,599856373 | 28008   | ALDH3A2  |     |
| chr17_44911270_44911728 | pre-BCG1_v_pre-BCG10_up | 0,967468488 | 0,00148077  | 0,544998581 | -15373  | WNT3     |     |
| chr17_47423381_47423996 | pre-BCG1_v_pre-BCG10_up | 0,638155876 | 0,01747399  | 0,594721648 | 16146   | ZNF652   |     |
| chr17_68599032_68601980 | pre-BCG1_v_pre-BCG10_up | 0,987211884 | 0,001664434 | 0,544998581 | 434830  | KCNJ2    |     |
| chr17_74861124_74861929 | pre-BCG1_v_pre-BCG10_up | 0,743302875 | 0,022396088 | 0,599856373 | -7202   | MGAT5B   |     |
| chr17_78258513_78259494 | pre-BCG1_v_pre-BCG10_up | 1,152954686 | 0,000148589 | 0,433052116 | 24337   | RNF213   |     |
| chr18_68721796_68722330 | pre-BCG1_v_pre-BCG10_up | 0,615846797 | 0,024985644 | 0,60063625  | -404083 | GTSCR1   |     |
| chr19_1000174_1000965   | pre-BCG1_v_pre-BCG10_up | 0,617785294 | 0,006606671 | 0,548740748 | 152     | GRIN3B   |     |
| chr19_1154578_1155306   | pre-BCG1_v_pre-BCG10_up | 0,814920222 | 0,015665864 | 0,594721648 | 19340   | SBNO2    |     |
| chr19_18021848_18022310 | pre-BCG1_v_pre-BCG10_up | 0,624360238 | 0,046497421 | 0,645206643 | -23826  | CCDC124  |     |
| chr19_2610845_2611516   | pre-BCG1_v_pre-BCG10_up | 0,613873657 | 8,27E-05    | 0,401982801 | 91526   | GNG7     |     |
| chr19_2720891_2721772   | pre-BCG1_v_pre-BCG10_up | 0,602782008 | 0,004274399 | 0,548740748 | 84      | DIRAS1   |     |
| chr19_35673137_35673721 | pre-BCG1_v_pre-BCG10_up | 0,683554058 | 0,010375829 | 0,573432612 | 27753   | FXD5     |     |
| chr19_36421332_36422109 | pre-BCG1_v_pre-BCG10_up | 0,708318616 | 0,047638346 | 0,646048229 | -4731   | LRFN3    |     |

|                          |                         |             |             |             |         |         |  |
|--------------------------|-------------------------|-------------|-------------|-------------|---------|---------|--|
| chr19_44808740_44809365  | pre-BCG1_v_pre-BCG10_up | 0,598885496 | 0,042168133 | 0,642840791 | 125     | ZNF235  |  |
| chr19_51018636_51019291  | pre-BCG1_v_pre-BCG10_up | 0,745609755 | 0,008072415 | 0,548740748 | -1822   | ASPDH   |  |
| chr19_53982086_53983094  | pre-BCG1_v_pre-BCG10_up | 0,581038526 | 0,002093945 | 0,544998581 | 11601   | ZNF813  |  |
| chr19_7645454_7647007    | pre-BCG1_v_pre-BCG10_up | 0,70531429  | 0,002398524 | 0,544998581 | -14557  | CAMSAP3 |  |
| chr19_7917319_7918073    | pre-BCG1_v_pre-BCG10_up | 0,629756327 | 0,018023732 | 0,594721648 | 6267    | EVI5L   |  |
| chr2_130963650_130964280 | pre-BCG1_v_pre-BCG10_up | 0,859778076 | 0,018443233 | 0,594721648 | -7931   | TUBA3E  |  |
| chr2_176122575_176123082 | pre-BCG1_v_pre-BCG10_up | 0,747030181 | 0,002124942 | 0,544998581 | -73494  | ATP5G3  |  |
| chr2_199463129_199463701 | pre-BCG1_v_pre-BCG10_up | 0,611853714 | 0,012444525 | 0,584261418 | 793989  | PLCL1   |  |
| chr2_207681283_207681814 | pre-BCG1_v_pre-BCG10_up | 1,088225631 | 0,006846216 | 0,548740748 | -51278  | MDH1B   |  |
| chr2_218065225_218065862 | pre-BCG1_v_pre-BCG10_up | 0,726303877 | 0,037271135 | 0,630464383 | -340757 | TNP1    |  |
| chr2_222671267_222672315 | pre-BCG1_v_pre-BCG10_up | 0,589751762 | 0,001404558 | 0,544998581 | -234781 | EPHA4   |  |
| chr2_38535872_38536457   | pre-BCG1_v_pre-BCG10_up | 0,629447023 | 0,006482044 | 0,548740748 | 68239   | ATL2    |  |
| chr2_47369090_47369828   | pre-BCG1_v_pre-BCG10_up | 0,75061791  | 0,008096932 | 0,548740748 | 13058   | C2orf61 |  |
| chr2_56183678_56184972   | pre-BCG1_v_pre-BCG10_up | 0,637187569 | 0,014171787 | 0,594721648 | -33051  | EFEMP1  |  |
| chr2_73981102_73981611   | pre-BCG1_v_pre-BCG10_up | 0,944428154 | 0,002599148 | 0,548740748 | -16844  | TPRKB   |  |
| chr20_1184994_1185901    | pre-BCG1_v_pre-BCG10_up | 0,607463888 | 0,014259035 | 0,594721648 | -20331  | TMEM74B |  |
| chr20_32031166_32031739  | pre-BCG1_v_pre-BCG10_up | 0,655006331 | 0,031904816 | 0,62614993  | 245     | SNTA1   |  |
| chr20_38164942_38165424  | pre-BCG1_v_pre-BCG10_up | 0,797586989 | 0,015602204 | 0,594721648 | 574205  | DHX35   |  |
| chr22_19723411_19724251  | pre-BCG1_v_pre-BCG10_up | 0,721987369 | 0,040840498 | 0,640955277 | 13363   | GP1BB   |  |
| chr22_38958866_38960002  | pre-BCG1_v_pre-BCG10_up | 0,628424025 | 0,046106616 | 0,645193875 | 6857    | DMC1    |  |
| chr3_12004155_12004931   | pre-BCG1_v_pre-BCG10_up | 0,630614838 | 0,021619581 | 0,597025879 | -116150 | TAMM41  |  |
| chr3_127915089_127915604 | pre-BCG1_v_pre-BCG10_up | 0,648151194 | 0,044203621 | 0,644410661 | 43050   | EEFSEC  |  |
| chr3_138434348_138435340 | pre-BCG1_v_pre-BCG10_up | 0,808285111 | 0,000640263 | 0,544998581 | 107393  | FAIM    |  |
| chr3_141051071_141051620 | pre-BCG1_v_pre-BCG10_up | 0,970285492 | 0,003790667 | 0,548740748 | -55308  | ZBTB38  |  |
| chr3_46565820_46566396   | pre-BCG1_v_pre-BCG10_up | 0,711577826 | 0,017778708 | 0,594721648 | 27127   | RTP3    |  |
| chr3_46926648_46927199   | pre-BCG1_v_pre-BCG10_up | 0,963219541 | 0,015383776 | 0,594721648 | 2077    | PTH1R   |  |
| chr3_9916678_9917495     | pre-BCG1_v_pre-BCG10_up | 1,169343007 | 9,51E-07    | 0,018489064 | 3108    | CIDEC   |  |
| chr4_165378790_165379636 | pre-BCG1_v_pre-BCG10_up | 0,709273799 | 0,001315938 | 0,544998581 | -74011  | MARCHF1 |  |
| chr5_120465493_120465806 | pre-BCG1_v_pre-BCG10_up | 0,787283331 | 0,019980349 | 0,594721648 | 665631  | PRR16   |  |
| chr5_149271493_149272437 | pre-BCG1_v_pre-BCG10_up | 0,589386543 | 0,016270069 | 0,594721648 | 52391   | PDE6A   |  |
| chr5_31854616_31855318   | pre-BCG1_v_pre-BCG10_up | 0,655898918 | 0,024276151 | 0,60063625  | 215450  | PDZD2   |  |
| chr5_88680214_88680682   | pre-BCG1_v_pre-BCG10_up | 0,633687915 | 0,007283208 | 0,548740748 | -480549 | MEF2C   |  |



|                          |                           |              |             |             |         |           |  |
|--------------------------|---------------------------|--------------|-------------|-------------|---------|-----------|--|
| chr6_10523873_10524547   | pre-BCG1_v_pre-BCG10_up   | 0,705498004  | 0,001970618 | 0,544998581 | -4379   | GCNT2     |  |
| chr6_147508112_147508790 | pre-BCG1_v_pre-BCG10_up   | 0,749886735  | 0,022300569 | 0,599856373 | -17218  | STXBPS    |  |
| chr6_159168949_159170125 | pre-BCG1_v_pre-BCG10_up   | 0,63725387   | 0,004409672 | 0,548740748 | 70907   | EZR       |  |
| chr7_130491941_130492469 | pre-BCG1_v_pre-BCG10_up   | 0,767070171  | 0,015581388 | 0,594721648 | -73317  | KLF14     |  |
| chr7_16850822_16851660   | pre-BCG1_v_pre-BCG10_up   | 0,616428428  | 0,008906597 | 0,548740748 | -6537   | AGR2      |  |
| chr7_28957866_28958469   | pre-BCG1_v_pre-BCG10_up   | 0,795621885  | 0,034791568 | 0,626474973 | -275860 | CHN2      |  |
| chr7_35971340_35971856   | pre-BCG1_v_pre-BCG10_up   | 0,854108682  | 0,012544774 | 0,584685955 | 130971  | SEPT7     |  |
| chr7_39609558_39610097   | pre-BCG1_v_pre-BCG10_up   | 0,692997094  | 0,039287252 | 0,636254061 | 3853    | YAE1D1    |  |
| chr7_39833152_39833706   | pre-BCG1_v_pre-BCG10_up   | 0,595086104  | 0,016168829 | 0,594721648 | -156207 | CDK13     |  |
| chr7_64463539_64464431   | pre-BCG1_v_pre-BCG10_up   | 0,710418485  | 0,012356707 | 0,583420865 | 3046    | ERV3-1    |  |
| chr7_6526535_6527062     | pre-BCG1_v_pre-BCG10_up   | 0,795607526  | 0,001981361 | 0,544998581 | -2926   | KDELR2    |  |
| chr7_73624006_73624641   | pre-BCG1_v_pre-BCG10_up   | 0,783004917  | 0,008285905 | 0,548740748 | 576     | LAT2      |  |
| chr7_76281323_76281940   | pre-BCG1_v_pre-BCG10_up   | 0,666800073  | 0,022398838 | 0,599856373 | -25074  | POMZP3    |  |
| chr8_103499318_103500979 | pre-BCG1_v_pre-BCG10_up   | 0,594539971  | 0,000443046 | 0,508254413 | -63651  | ODF1      |  |
| chr8_121639626_121640067 | pre-BCG1_v_pre-BCG10_up   | 0,722472369  | 0,036094072 | 0,626474973 | 182181  | MTBP      |  |
| chr8_144332010_144332542 | pre-BCG1_v_pre-BCG10_up   | 0,777658363  | 0,020901145 | 0,595272408 | 3178    | ZFP41     |  |
| chr8_21787326_21788103   | pre-BCG1_v_pre-BCG10_up   | 0,847886751  | 0,002772556 | 0,548740748 | 10533   | XPO7      |  |
| chr8_38974112_38974864   | pre-BCG1_v_pre-BCG10_up   | 0,640222771  | 0,013688614 | 0,593059077 | 9320    | ADAM32    |  |
| chr8_76677782_76678320   | pre-BCG1_v_pre-BCG10_up   | 0,694797558  | 0,010430628 | 0,574334587 | 225947  | HNF4G     |  |
| chr8_79611867_79612383   | pre-BCG1_v_pre-BCG10_up   | 0,742441311  | 0,013633655 | 0,593059077 | 33843   | ZC2HC1A   |  |
| chr9_121736375_121736868 | pre-BCG1_v_pre-BCG10_up   | 0,775484482  | 0,011635617 | 0,58050417  | 395123  | BRINP1    |  |
| chr9_122213608_122214358 | pre-BCG1_v_pre-BCG10_up   | 0,656148186  | 0,000822974 | 0,544998581 | -82238  | BRINP1    |  |
| chr9_130938798_130939748 | pre-BCG1_v_pre-BCG10_up   | 0,75822217   | 0,008264262 | 0,548740748 | 16734   | C9orf16   |  |
| chr9_38423910_38424641   | pre-BCG1_v_pre-BCG10_up   | 0,852779073  | 0,015019841 | 0,594721648 | 168     | IGFBPL1   |  |
| chr9_41235084_41235631   | pre-BCG1_v_pre-BCG10_up   | 0,635721704  | 0,035660341 | 0,626474973 | 92006   | SPATA31A4 |  |
| chr9_4490073_4491116     | pre-BCG1_v_pre-BCG10_up   | 0,730455972  | 0,023552036 | 0,60063625  | 151     | SLC1A1    |  |
| chr9_93131329_93131827   | pre-BCG1_v_pre-BCG10_up   | 0,796112484  | 0,017623562 | 0,594721648 | 273808  | DIRAS2    |  |
| chrX_11427265_11428190   | pre-BCG1_v_pre-BCG10_up   | 0,648700614  | 0,005955701 | 0,548740748 | 116195  | AMELX     |  |
| chrX_134990818_134991429 | pre-BCG1_v_pre-BCG10_up   | 0,595369647  | 0,031661952 | 0,625963685 | 65098   | MMGT1     |  |
| chrX_65407078_65407688   | pre-BCG1_v_pre-BCG10_up   | 0,735682222  | 0,022700228 | 0,599856373 | 24992   | HEPH      |  |
| chr1_117001991_117002583 | pre-BCG1_v_pre-BCG10_down | -0,790505144 | 0,032139784 | 0,62614993  | 85798   | ATP1A1    |  |
| chr1_158930786_158934314 | pre-BCG1_v_pre-BCG10_down | -0,594576303 | 0,033768811 | 0,626474973 | 31208   | PYHIN1    |  |

|                           |                           |              |             |             |         |           |  |
|---------------------------|---------------------------|--------------|-------------|-------------|---------|-----------|--|
| chr1_198638405_198644441  | pre-BCG1_v_pre-BCG10_down | -0,634205202 | 0,034648769 | 0,626474973 | 33253   | PTPRC     |  |
| chr1_40388717_40389694    | pre-BCG1_v_pre-BCG10_down | -0,659162379 | 0,020558266 | 0,594804894 | -21521  | MYCL      |  |
| chr1_84144173_84146537    | pre-BCG1_v_pre-BCG10_down | -0,770703574 | 0,012366589 | 0,583420865 | 319460  | TTLL7     |  |
| chr10_6140817_6141751     | pre-BCG1_v_pre-BCG10_down | -0,596492092 | 0,023867073 | 0,60063625  | 9975    | RBM17     |  |
| chr10_96270807_96271460   | pre-BCG1_v_pre-BCG10_down | -0,759101416 | 0,00230029  | 0,544998581 | -34440  | HELLS     |  |
| chr11_33197863_33198328   | pre-BCG1_v_pre-BCG10_down | -0,625573562 | 0,047875917 | 0,646675302 | -15085  | CSTF3     |  |
| chr12_10386640_10390138   | pre-BCG1_v_pre-BCG10_down | -0,650107969 | 0,047313327 | 0,645879721 | 22985   | GABARAPL1 |  |
| chr12_118358663_118359778 | pre-BCG1_v_pre-BCG10_down | -0,618503236 | 0,025083125 | 0,60063625  | 47567   | KSR2      |  |
| chr12_14385600_14386559   | pre-BCG1_v_pre-BCG10_down | -0,753641639 | 0,036185825 | 0,626474973 | -132536 | ATF7IP    |  |
| chr12_15546470_15547122   | pre-BCG1_v_pre-BCG10_down | -0,599186683 | 0,032939295 | 0,62614993  | 71465   | PTPRO     |  |
| chr12_31251921_31252469   | pre-BCG1_v_pre-BCG10_down | -0,620745497 | 0,024731492 | 0,60063625  | 25416   | DDX11     |  |
| chr12_8989434_8991604     | pre-BCG1_v_pre-BCG10_down | -0,791524434 | 0,003796001 | 0,548740748 | 15451   | A2ML1     |  |
| chr13_98570871_98571394   | pre-BCG1_v_pre-BCG10_down | -0,835667174 | 0,002874598 | 0,548740748 | -34796  | IPO5      |  |
| chr16_87490634_87491479   | pre-BCG1_v_pre-BCG10_down | -0,68202229  | 0,033927276 | 0,626474973 | 34594   | ZCCHC14   |  |
| chr17_18186002_18186641   | pre-BCG1_v_pre-BCG10_down | -0,656352758 | 0,046284813 | 0,645206643 | 21898   | MIEF2     |  |
| chr17_7851500_7851938     | pre-BCG1_v_pre-BCG10_down | -0,774987418 | 0,017748352 | 0,594721648 | 16246   | CNTROB    |  |
| chr19_50418781_50420147   | pre-BCG1_v_pre-BCG10_down | -0,617572579 | 0,003075677 | 0,548740748 | -12936  | ATF5      |  |
| chr19_6996859_6998063     | pre-BCG1_v_pre-BCG10_down | -0,714203377 | 0,016982617 | 0,594721648 | -33128  | MBD3L5    |  |
| chr2_142877514_142879767  | pre-BCG1_v_pre-BCG10_down | -0,61281026  | 0,016816174 | 0,594721648 | 10629   | LRP1B     |  |
| chr2_143128594_143130833  | pre-BCG1_v_pre-BCG10_down | -0,651792349 | 0,031347673 | 0,623648633 | -240444 | LRP1B     |  |
| chr2_143248012_143248756  | pre-BCG1_v_pre-BCG10_down | -0,802845886 | 0,022592999 | 0,599856373 | -359114 | LRP1B     |  |
| chr2_159515626_159516942  | pre-BCG1_v_pre-BCG10_down | -0,606399224 | 0,001577781 | 0,544998581 | -135545 | DAPL1     |  |
| chr2_203706607_203710225  | pre-BCG1_v_pre-BCG10_down | -0,588873166 | 0,033385114 | 0,626474973 | 27949   | ICA1L     |  |
| chr21_14543894_14546545   | pre-BCG1_v_pre-BCG10_down | -0,738720884 | 0,033879481 | 0,626474973 | -437278 | POTED     |  |
| chr21_17793651_17794173   | pre-BCG1_v_pre-BCG10_down | -0,692761368 | 0,021596394 | 0,597025879 | 691568  | USP25     |  |
| chr3_28292893_28294004    | pre-BCG1_v_pre-BCG10_down | -0,583330429 | 0,027024569 | 0,607256117 | 10363   | CMC1      |  |
| chr4_39030525_39032408    | pre-BCG1_v_pre-BCG10_down | -0,687976873 | 0,004429759 | 0,548740748 | 2574    | TMEM156   |  |
| chr5_150846511_150847193  | pre-BCG1_v_pre-BCG10_down | -0,615021289 | 0,015149072 | 0,594721648 | 19695   | SLC36A1   |  |
| chr5_58491289_58493150    | pre-BCG1_v_pre-BCG10_down | -0,741564163 | 0,011261264 | 0,5762077   | 613353  | RAB3C     |  |
| chr5_96896313_96896924    | pre-BCG1_v_pre-BCG10_down | -0,722226679 | 0,008494528 | 0,548740748 | -377655 | RIOK2     |  |
| chr6_127899285_127901264  | pre-BCG1_v_pre-BCG10_down | -0,674495853 | 0,007816329 | 0,548740748 | 1956    | C6orf58   |  |
| chr6_156781504_156782711  | pre-BCG1_v_pre-BCG10_down | -0,823521896 | 0,007097316 | 0,548740748 | -316955 | ARID1B    |  |

|                          |                           |              |             |             |         |          |  |
|--------------------------|---------------------------|--------------|-------------|-------------|---------|----------|--|
| chr6_158649979_158651155 | pre-BCG1_v_pre-BCG10_down | -0,581363151 | 0,017123118 | 0,594721648 | 61183   | GTF2H5   |  |
| chr7_33039359_33040256   | pre-BCG1_v_pre-BCG10_down | -0,789710249 | 0,005050776 | 0,548740748 | 42791   | FKBP9    |  |
| chr7_38251676_38253400   | pre-BCG1_v_pre-BCG10_down | -0,894214286 | 0,015445648 | 0,594721648 | 34714   | STARD3NL |  |
| chr7_38302919_38304101   | pre-BCG1_v_pre-BCG10_down | -0,804916855 | 0,002467339 | 0,544998581 | 85686   | STARD3NL |  |
| chr8_23230613_23231216   | pre-BCG1_v_pre-BCG10_down | -0,724729047 | 0,018123245 | 0,594721648 | 30838   | LOXL2    |  |
| chr9_130038378_130038894 | pre-BCG1_v_pre-BCG10_down | -0,757030665 | 0,015427617 | 0,594721648 | 11831   | GARNL3   |  |
| chrX_131812614_131813431 | pre-BCG1_v_pre-BCG10_down | -0,604922928 | 0,001585819 | 0,544998581 | -239305 | MBNL3    |  |
| chrX_54921055_54921989   | pre-BCG1_v_pre-BCG10_down | -0,676063086 | 0,005176935 | 0,548740748 | -25722  | TRO      |  |

**Supplementary Table 5 - List of selected candidate trained immunity genes.**

The mechanism/pathway based on which this gene is important for trained immunity is displayed in the second column and the reference, if available, is shown in the third column.

| Gene name        | Mechanism/Pathway important for trained immunity (TI) | Reference for trained immunity                                                                                                                                                                             |
|------------------|-------------------------------------------------------|------------------------------------------------------------------------------------------------------------------------------------------------------------------------------------------------------------|
| AIM2             | Inflammasome signaling                                |                                                                                                                                                                                                            |
| ASC/PYCARD/CARD5 | Inflammasome signaling                                | Arts, R.J.W. et al., BCG Vaccination Protects against Experimental Viral Infection in Humans through the Induction of Cytokines Associated with Trained Immunity. <i>Cell host &amp; microbe</i> 23, 2018. |
| ATG16L1          | Autophagy                                             |                                                                                                                                                                                                            |
| ATG16L2          | Autophagy                                             |                                                                                                                                                                                                            |
| ATG2B            | Autophagy                                             | Buffen, K. et al., Autophagy controls BCG-induced trained immunity and the response to intravesical BCG therapy for bladder cancer. <i>PLoS pathogens</i> 10, 2014.                                        |
| ATG5             | Autophagy                                             |                                                                                                                                                                                                            |
| ATG7             | Autophagy                                             |                                                                                                                                                                                                            |
| CASP1            | Inflammasome signaling                                |                                                                                                                                                                                                            |
| CASP5            | Inflammasome signaling                                |                                                                                                                                                                                                            |
| EHMT2            | Epigenetic enzyme                                     | Mourits, V.P. et al., Lysine methyltransferase G9a is an important modulator of trained immunity. <i>Clinical &amp; translational immunology</i> 10, 2021.                                                 |
| GBP1             | Inflammasome signaling                                |                                                                                                                                                                                                            |
| GBP2             | Inflammasome signaling                                |                                                                                                                                                                                                            |
| GBP3             | Inflammasome signaling                                |                                                                                                                                                                                                            |
| GBP4             | Inflammasome signaling                                |                                                                                                                                                                                                            |
| GBP5             | Inflammasome signaling                                |                                                                                                                                                                                                            |
| HK2              | Glycolysis                                            | Arts, R.J.W. et al., Immunometabolic Pathways in BCG-Induced Trained Immunity. <i>Cell reports</i> 17, 2016.                                                                                               |
| HNF1A            | Myelopoiesis                                          | Cirovic, B. et al., BCG Vaccination in Humans Elicits Trained Immunity via the Hematopoietic Progenitor Compartment. <i>Cell host &amp; microbe</i> 28, 2020.                                              |
| HNF1B            | Myelopoiesis                                          | Cirovic, B. et al., BCG Vaccination in Humans Elicits Trained Immunity via the Hematopoietic Progenitor Compartment. <i>Cell host &amp; microbe</i> 28, 2020.                                              |

|             |                        |                                                                                                                                                                                                            |
|-------------|------------------------|------------------------------------------------------------------------------------------------------------------------------------------------------------------------------------------------------------|
| IL18        | Ti cytokine            |                                                                                                                                                                                                            |
| IL1B        | Ti cytokine            | Arts, R.J.W. et al., BCG Vaccination Protects against Experimental Viral Infection in Humans through the Induction of Cytokines Associated with Trained Immunity. <i>Cell host &amp; microbe</i> 23, 2018. |
| IL1RN       | Ti cytokine            |                                                                                                                                                                                                            |
| IL32        | Ti cytokine            | Dos Santos, J.C. et al., $\beta$ -Glucan-Induced Trained Immunity Protects against <i>Leishmania braziliensis</i> Infection: a Crucial Role for IL-32. <i>Cell reports</i> 28, 2019.                       |
| IL6         | Ti cytokine            |                                                                                                                                                                                                            |
| KDM4A       | Epigenetic enzyme      | Moorlag, S. et al., An integrative genomics approach identifies KDM4 as a modulator of trained immunity. <i>Eur J Immunol</i> 2021.                                                                        |
| KDM4B       | Epigenetic enzyme      | Moorlag, S. et al., An integrative genomics approach identifies KDM4 as a modulator of trained immunity. <i>Eur J Immunol</i> 2021.                                                                        |
| KDM4C       | Epigenetic enzyme      | Moorlag, S. et al., An integrative genomics approach identifies KDM4 as a modulator of trained immunity. <i>Eur J Immunol</i> 2021.                                                                        |
| KDM4D       | Epigenetic enzyme      | Moorlag, S. et al., An integrative genomics approach identifies KDM4 as a modulator of trained immunity. <i>Eur J Immunol</i> 2021.                                                                        |
| KDM4E       | Epigenetic enzyme      | Moorlag, S. et al., An integrative genomics approach identifies KDM4 as a modulator of trained immunity. <i>Eur J Immunol</i> 2021.                                                                        |
| LAMP2       | Autophagy              |                                                                                                                                                                                                            |
| NLRP3       | Inflammasome signaling |                                                                                                                                                                                                            |
| NOD2/CARD15 | Autophagy              |                                                                                                                                                                                                            |
| PFKP        | Glycolysis             | Arts, R.J.W. et al., Immunometabolic Pathways in BCG-Induced Trained Immunity. <i>Cell reports</i> 17, 2016.                                                                                               |
| RIPK2       | Autophagy              |                                                                                                                                                                                                            |
| TNF         | Ti cytokine            |                                                                                                                                                                                                            |

**Supplementary Table 6 - Table with the differentially expressed genes between pre-BCG1 and BCG6.**

This table shows the differentially expressed genes at  $p < 0.05$  between pre-BCG1 and BCG6. Candidate trained immunity genes are indicated in the last column.

| Gene name   | log2 Fold Change | p value     | adjusted p value | Candidate trained immunity gene |
|-------------|------------------|-------------|------------------|---------------------------------|
| FANCA       | 0,416164968      | 2,79E-05    | 0,019944468      |                                 |
| APOL2       | 0,392119005      | 5,05E-05    | 0,030298792      |                                 |
| GBP1        | 0,837182252      | 0,000106425 | 0,052781665      | Yes                             |
| GBP2        | 0,535894975      | 0,000237511 | 0,114113007      | Yes                             |
| SLAMF8      | 0,824175426      | 0,000273093 | 0,129189933      |                                 |
| ACE         | 0,814849641      | 0,000395597 | 0,176293017      |                                 |
| IRF9        | 0,403102363      | 0,000393838 | 0,176293017      |                                 |
| PSTPIP2     | 0,425863886      | 0,000403355 | 0,177182411      |                                 |
| AP000275.65 | 1,569202645      | 0,000428268 | 0,182900266      |                                 |
| ALPK1       | 0,484670341      | 0,000554252 | 0,227017741      |                                 |
| TGM2        | 0,709969574      | 0,000704876 | 0,277874771      |                                 |
| IL27        | 1,035307566      | 0,000805327 | 0,305716094      |                                 |
| KCNMA1      | 1,427699707      | 0,000833368 | 0,308737816      |                                 |
| C8orf76     | 0,37165149       | 0,000827852 | 0,308737816      |                                 |
| C1QA        | 0,784136216      | 0,000909738 | 0,326236012      |                                 |
| SDC3        | 0,679010653      | 0,000923039 | 0,326236012      |                                 |
| APOL3       | 0,425167377      | 0,000956946 | 0,330619403      |                                 |
| TAP1        | 0,38678848       | 0,001215249 | 0,406170553      |                                 |
| SPDYE2      | -1,881858553     | 0,001232919 | 0,407645542      |                                 |
| FCGBP       | -0,858008712     | 0,001278171 | 0,418111355      |                                 |
| JUN         | -1,119329459     | 0,001344874 | 0,435300235      |                                 |
| ODF3B       | 0,662251968      | 0,001434222 | 0,459065053      |                                 |
| GBP5        | 0,676898788      | 0,00160993  | 0,505140205      | Yes                             |
| MT2A        | 0,510167379      | 0,001789389 | 0,544771425      |                                 |
| SLC30A4     | -0,608250308     | 0,001857706 | 0,560025368      |                                 |
| APOL4       | 1,002388629      | 0,001906898 | 0,565358661      |                                 |
| BATF2       | 0,987772806      | 0,001937874 | 0,566131453      |                                 |
| AL589988.1  | -3,24698225      | 0,001963859 | 0,566131453      |                                 |
| C17orf81    | 0,465103748      | 0,002130619 | 0,601049521      |                                 |
| SERPING1    | 0,882433958      | 0,002439069 | 0,678374816      |                                 |
| C1QB        | 1,049365496      | 0,00262936  | 0,709212181      |                                 |
| MUC1        | 0,851786943      | 0,002740676 | 0,720282322      |                                 |
| AIM2        | 0,713404476      | 0,002734595 | 0,720282322      | Yes                             |
| STAT1       | 0,523590248      | 0,0027902   | 0,727083529      |                                 |
| DDB2        | 0,378676649      | 0,002844875 | 0,735101394      |                                 |
| C2          | 0,858142626      | 0,002932122 | 0,745122465      |                                 |
| IRS1        | -0,388456714     | 0,002909691 | 0,745122465      |                                 |
| IGFBP3      | -0,524377716     | 0,003006993 | 0,751997231      |                                 |
| CCL3        | -0,678866553     | 0,003008087 | 0,751997231      |                                 |
| FGFBP2      | -0,541669259     | 0,003077319 | 0,763100596      |                                 |
| KLHDC7B     | 0,545207163      | 0,003205436 | 0,764061534      |                                 |

|               |              |             |             |     |
|---------------|--------------|-------------|-------------|-----|
| GCH1          | 0,433329008  | 0,003261928 | 0,771546393 |     |
| RUFY4         | 0,626651041  | 0,003478501 | 0,808708187 |     |
| BOK           | -0,857008397 | 0,003474398 | 0,808708187 |     |
| CD40          | 0,47463582   | 0,003779509 | 0,842145826 |     |
| C1QC          | 1,173979553  | 0,003921315 | 0,867457017 |     |
| ARRDC3        | -0,399533063 | 0,004330665 | 0,931971002 |     |
| AKR1C3        | -0,596546359 | 0,004276409 | 0,931971002 |     |
| HBA1          | -1,453582641 | 0,004334185 | 0,931971002 |     |
| IL2RB         | -0,519396504 | 0,004467671 | 0,954002865 |     |
| PDGFD         | -0,590699808 | 0,004618538 | 0,972708439 |     |
| NCF1          | 0,39272474   | 0,00468607  | 0,980217368 |     |
| RP5-977B1.10  | 1,677033087  | 0,049074668 | 1           |     |
| MEF2BNB-MEF2B | 1,248862831  | 0,023548968 | 1           |     |
| ANKRD22       | 1,09761395   | 0,008332145 | 1           |     |
| TBC1D3C       | 0,996891295  | 0,020485474 | 1           |     |
| ETV7          | 0,947300542  | 0,00555     | 1           |     |
| KREMEN1       | 0,883521368  | 0,0077558   | 1           |     |
| CDKN3         | 0,816848738  | 0,009116359 | 1           |     |
| CENPM         | 0,715971748  | 0,039455664 | 1           |     |
| EXOC3L1       | 0,707652082  | 0,022797635 | 1           |     |
| FAM20A        | 0,686287983  | 0,029008276 | 1           |     |
| FCGR1A        | 0,677957968  | 0,016560352 | 1           |     |
| NME2          | 0,676923434  | 0,008742964 | 1           |     |
| ITGA7         | 0,645611823  | 0,04749242  | 1           |     |
| TNNT1         | 0,634606854  | 0,013908199 | 1           |     |
| SEPTIN4       | 0,619245911  | 0,009684948 | 1           |     |
| FCGR1B        | 0,610630851  | 0,022187444 | 1           |     |
| PRSS21        | 0,606527046  | 0,012742105 | 1           |     |
| CD274         | 0,589720504  | 0,023818374 | 1           |     |
| LGALS3BP      | 0,58540446   | 0,018172071 | 1           |     |
| GPER          | 0,580884788  | 0,030727915 | 1           |     |
| HMGB3         | 0,568119229  | 0,049107076 | 1           |     |
| TNFSF10       | 0,56185307   | 0,010725483 | 1           |     |
| CDCA5         | 0,552782326  | 0,02692685  | 1           |     |
| CCDC154       | 0,545911996  | 0,049495278 | 1           |     |
| PLA2G4B       | 0,544689511  | 0,018914299 | 1           |     |
| ZNF222        | 0,524210862  | 0,029833271 | 1           |     |
| ZNF20         | 0,523429103  | 0,040410492 | 1           |     |
| EPSTI1        | 0,515936225  | 0,013113973 | 1           |     |
| LAP3          | 0,514206615  | 0,006674993 | 1           |     |
| GBP4          | 0,50391882   | 0,006976171 | 1           | Yes |
| VAMP5         | 0,501162477  | 0,006757253 | 1           |     |
| SLC6A12       | 0,500340913  | 0,033414764 | 1           |     |
| C15orf52      | 0,4951153    | 0,035068023 | 1           |     |
| MARCO         | 0,491052503  | 0,017908252 | 1           |     |

|           |              |             |   |
|-----------|--------------|-------------|---|
| IL15RA    | 0,487243844  | 0,008562457 | 1 |
| CDCA7     | 0,486726514  | 0,033914711 | 1 |
| SLC26A1   | 0,479122701  | 0,017501327 | 1 |
| CASP5     | 0,476573284  | 0,039961715 | 1 |
| MB21D1    | 0,465239875  | 0,02401357  | 1 |
| SAMD4A    | 0,464845301  | 0,032420175 | 1 |
| SLC31A2   | 0,459762196  | 0,035448672 | 1 |
| WARS      | 0,458540321  | 0,012393938 | 1 |
| CLEC12B   | 0,454642725  | 0,014497235 | 1 |
| NUSAP1    | 0,453901785  | 0,038290692 | 1 |
| P2RY13    | 0,444467981  | 0,011625924 | 1 |
| C9orf139  | 0,442046919  | 0,019929476 | 1 |
| TYMP      | 0,440500161  | 0,005591969 | 1 |
| MT-ATP6   | 0,432481895  | 0,039013272 | 1 |
| TICAM2    | 0,427650408  | 0,018495703 | 1 |
| UHRF1     | 0,427277685  | 0,017741661 | 1 |
| EPS8L1    | 0,426598084  | 0,030550779 | 1 |
| IRF1      | 0,424670196  | 0,014617206 | 1 |
| S100A13   | 0,420386919  | 0,049248263 | 1 |
| DDO       | 0,416633561  | 0,035031103 | 1 |
| NAT1      | 0,413670028  | 0,032232423 | 1 |
| RPGRIPI   | 0,413229016  | 0,029692081 | 1 |
| PARP9     | 0,411534011  | 0,011503059 | 1 |
| FSTL3     | 0,409229824  | 0,042162937 | 1 |
| TNFAIP2   | 0,399135073  | 0,014081365 | 1 |
| HSPA6     | 0,398426692  | 0,011541368 | 1 |
| KCNMB1    | 0,393645458  | 0,012947058 | 1 |
| MT-ND6    | 0,390070066  | 0,046631752 | 1 |
| FANCL     | 0,388642912  | 0,027142752 | 1 |
| ZNF684    | 0,387625487  | 0,01041037  | 1 |
| MT-ND2    | 0,386072627  | 0,044502769 | 1 |
| FAM26F    | 0,384404995  | 0,037197222 | 1 |
| MT-CO1    | 0,381938213  | 0,029537893 | 1 |
| ZMYND15   | 0,38091803   | 0,045315862 | 1 |
| ECHDC3    | 0,377353262  | 0,046912018 | 1 |
| TRIM69    | 0,376236471  | 0,027204276 | 1 |
| J01415.25 | 0,375372852  | 0,035392278 | 1 |
| CES4A     | 0,374279573  | 0,047361718 | 1 |
| LRRC27    | 0,372686606  | 0,012191912 | 1 |
| FAM176C   | -0,372699564 | 0,021249875 | 1 |
| CD247     | -0,373601814 | 0,047762817 | 1 |
| ST3GAL3   | -0,377607622 | 0,037671208 | 1 |
| SYNE2     | -0,379180659 | 0,037297328 | 1 |
| YPEL1     | -0,381880614 | 0,025500207 | 1 |
| ACACB     | -0,383224259 | 0,040739728 | 1 |



|               |              |             |   |
|---------------|--------------|-------------|---|
| MYBL1         | -0,38719472  | 0,04464206  | 1 |
| RP11-1000B6.4 | -0,388639614 | 0,0468449   | 1 |
| IKZF2         | -0,399388604 | 0,021510074 | 1 |
| CLIC3         | -0,400131458 | 0,035843828 | 1 |
| SBK1          | -0,406436272 | 0,045781816 | 1 |
| RP11-277P12.7 | -0,410040371 | 0,022980627 | 1 |
| TLE1          | -0,41215121  | 0,033816508 | 1 |
| ZFPM1         | -0,41284894  | 0,01168682  | 1 |
| GZMM          | -0,413036446 | 0,049802174 | 1 |
| FCRL6         | -0,414475953 | 0,040292514 | 1 |
| CCDC144A      | -0,419136586 | 0,047712206 | 1 |
| SLAIN1        | -0,419191877 | 0,025081596 | 1 |
| TKTL1         | -0,433273247 | 0,022781026 | 1 |
| RAB30         | -0,434651822 | 0,040036936 | 1 |
| CST7          | -0,435674472 | 0,01922203  | 1 |
| NCALD         | -0,43658179  | 0,012586912 | 1 |
| ZNF853        | -0,439461289 | 0,037295084 | 1 |
| RALGPS2       | -0,439585199 | 0,014245521 | 1 |
| NSG1          | -0,4419114   | 0,029636123 | 1 |
| TSPAN5        | -0,443457068 | 0,025841639 | 1 |
| NKG7          | -0,443595085 | 0,019161666 | 1 |
| BICD1         | -0,446308637 | 0,006748931 | 1 |
| APBA2         | -0,446638838 | 0,043694812 | 1 |
| BCL7A         | -0,447556619 | 0,027998413 | 1 |
| TGFBR3        | -0,45011796  | 0,024936332 | 1 |
| PRF1          | -0,450913705 | 0,024223918 | 1 |
| ODZ1          | -0,453200436 | 0,015824294 | 1 |
| DUSP14        | -0,455604709 | 0,034462795 | 1 |
| S1PR5         | -0,458137919 | 0,020863878 | 1 |
| HOPX          | -0,458427845 | 0,020743564 | 1 |
| KIAA1377      | -0,458659193 | 0,03114167  | 1 |
| BANK1         | -0,460052878 | 0,032338396 | 1 |
| PTCH1         | -0,460556447 | 0,016763216 | 1 |
| ZNF831        | -0,460697733 | 0,02702505  | 1 |
| SH2D1B        | -0,461225575 | 0,00812831  | 1 |
| CCL4          | -0,463561883 | 0,039497886 | 1 |
| SLFN12L       | -0,472405125 | 0,031816351 | 1 |
| CCNJL         | -0,474170767 | 0,008047792 | 1 |
| DLG3          | -0,476414349 | 0,014885564 | 1 |
| PKIG          | -0,476434034 | 0,040815151 | 1 |
| F2R           | -0,488892189 | 0,014278129 | 1 |
| TPD52         | -0,489713857 | 0,038071167 | 1 |
| TMEM182       | -0,490816156 | 0,04734152  | 1 |
| MYOM2         | -0,492099626 | 0,041615676 | 1 |
| LRFN3         | -0,494504291 | 0,043369254 | 1 |

|           |              |             |   |
|-----------|--------------|-------------|---|
| FAIM3     | -0,499637977 | 0,038238886 | 1 |
| PCDH1     | -0,502047296 | 0,037726825 | 1 |
| KLRD1     | -0,504481521 | 0,01425441  | 1 |
| SLC38A1   | -0,509394109 | 0,029474403 | 1 |
| AGAP1     | -0,509692461 | 0,028713559 | 1 |
| C1orf21   | -0,510947176 | 0,011027812 | 1 |
| DTHD1     | -0,514596186 | 0,004913806 | 1 |
| PRSS23    | -0,515501534 | 0,017573282 | 1 |
| MICAL3    | -0,516296685 | 0,015747501 | 1 |
| MAGEE1    | -0,523746835 | 0,033274446 | 1 |
| ZNF570    | -0,526085188 | 0,016430441 | 1 |
| NCR1      | -0,529873842 | 0,014836874 | 1 |
| BCL2      | -0,536146943 | 0,023566452 | 1 |
| TNFRSF13B | -0,541079191 | 0,025341118 | 1 |
| PAWR      | -0,551909136 | 0,024349633 | 1 |
| ID3       | -0,567827047 | 0,034610038 | 1 |
| KLRB1     | -0,571230226 | 0,004903743 | 1 |
| CADM1     | -0,573608916 | 0,041904879 | 1 |
| ARL4D     | -0,574269887 | 0,013595168 | 1 |
| OSBPL10   | -0,576863528 | 0,015454784 | 1 |
| LPL       | -0,577805251 | 0,031316038 | 1 |
| SEZ6L     | -0,593641217 | 0,031822139 | 1 |
| C14orf45  | -0,620995817 | 0,009404158 | 1 |
| FCRL2     | -0,64213295  | 0,02215549  | 1 |
| KIR3DL1   | -0,651587879 | 0,01219294  | 1 |
| NOS3      | -0,65337981  | 0,020387454 | 1 |
| KIR2DL1   | -0,653937262 | 0,019597256 | 1 |
| RNF165    | -0,67222023  | 0,004987637 | 1 |
| KLRC4     | -0,695047506 | 0,033990308 | 1 |
| ADAMTS1   | -0,704489831 | 0,029959714 | 1 |
| MANEAL    | -0,708707868 | 0,005460479 | 1 |
| ZNF365    | -0,714988955 | 0,010056548 | 1 |
| MYEOV     | -0,7367308   | 0,041151876 | 1 |
| HCAR2     | -0,737938864 | 0,032048177 | 1 |
| B3GNT7    | -0,755433666 | 0,012924886 | 1 |
| NT5E      | -0,758367992 | 0,037755749 | 1 |
| FCRL1     | -0,806086183 | 0,013468328 | 1 |
| FCRLA     | -0,816093861 | 0,008902949 | 1 |
| BEND5     | -0,835404712 | 0,014744109 | 1 |
| PAX5      | -0,835450924 | 0,031484747 | 1 |
| CD79A     | -0,842368253 | 0,006208487 | 1 |
| AKAP5     | -0,848275099 | 0,011655695 | 1 |
| GRIP1     | -0,866412273 | 0,015946217 | 1 |
| FAM203B   | -0,922599113 | 0,034347834 | 1 |
| CXCR5     | -0,928303049 | 0,007193372 | 1 |

|        |              |             |   |
|--------|--------------|-------------|---|
| CA1    | -1,034054431 | 0,021892299 | 1 |
| ZNF415 | -1,056847483 | 0,007692159 | 1 |
| KCNG1  | -1,096160008 | 0,017440004 | 1 |
| CD200  | -1,192987911 | 0,009404661 | 1 |
| FOSB   | -1,217341649 | 0,025144828 | 1 |
| IL8    | -1,349314992 | 0,014854739 | 1 |
| HBA2   | -1,571906696 | 0,008096242 | 1 |
| SLC4A1 | -1,60444022  | 0,031414864 | 1 |
| HBB    | -1,672919008 | 0,008461082 | 1 |

**Supplementary Table 7 - Table with the differentially expressed genes between pre-BCG1 and pre-BCG7.**

This table shows the differentially expressed genes at  $p_{\text{adj}} < 0.05$  between pre-BCG1 and pre-BCG7. Candidate trained immunity genes are indicated in the last column.

| Gene name     | log2 Fold Change | p value     | adjusted p value | Candidate trained immunity gene |
|---------------|------------------|-------------|------------------|---------------------------------|
| RYR1          | 2,941            | 0,000117803 | 0,072446462      |                                 |
| ACE           | 0,874            | 0,000140314 | 0,082971722      |                                 |
| ITGA7         | 1,190            | 0,000215953 | 0,120733696      |                                 |
| HBA1          | -1,855           | 0,000272809 | 0,136969217      |                                 |
| TCN1          | -1,052           | 0,000326889 | 0,155547135      |                                 |
| HBA2          | -2,062           | 0,000513276 | 0,225467342      |                                 |
| CTSG          | -1,383           | 0,000660736 | 0,278314732      |                                 |
| DEFA3         | -1,496           | 0,000748616 | 0,311070294      |                                 |
| HBB           | -2,096           | 0,000974312 | 0,394199025      |                                 |
| PGLYRP1       | -1,421           | 0,001210993 | 0,477395128      |                                 |
| CEACAM6       | -1,532           | 0,001203513 | 0,477395128      |                                 |
| ELANE         | -1,041           | 0,001850065 | 0,693751727      |                                 |
| CFL2          | -0,701           | 0,002652792 | 0,971079608      |                                 |
| AREGB         | 2,247            | 0,032443113 | 1                |                                 |
| KCNMA1        | 1,272            | 0,002974942 | 1                |                                 |
| MEF2BNB-MEF2B | 1,269            | 0,02137519  | 1                |                                 |
| SAP25         | 1,149            | 0,005258327 | 1                |                                 |
| OVCA2         | 0,965            | 0,046970215 | 1                |                                 |
| SAPCD1        | 0,946            | 0,033293913 | 1                |                                 |
| NME2          | 0,750            | 0,003645995 | 1                |                                 |
| MUC1          | 0,710            | 0,01302624  | 1                |                                 |
| FAM20A        | 0,708            | 0,024165881 | 1                |                                 |
| FPR2          | 0,614            | 0,023707981 | 1                |                                 |
| MAMDC4        | 0,592            | 0,002876706 | 1                |                                 |
| HES4          | 0,585            | 0,033228181 | 1                |                                 |
| TWF1          | 0,582            | 0,027081585 | 1                |                                 |
| SIGLEC11      | 0,576            | 0,049585346 | 1                |                                 |
| GBP1          | 0,569            | 0,008447504 | 1                | Yes                             |
| RUFY4         | 0,566            | 0,008329557 | 1                |                                 |
| TGM2          | 0,553            | 0,008460209 | 1                |                                 |
| SLAMF8        | 0,545            | 0,016438939 | 1                |                                 |
| CCDC153       | 0,541            | 0,048089647 | 1                |                                 |
| ADORA3        | 0,523            | 0,040045555 | 1                |                                 |
| EFEMP2        | 0,522            | 0,018114543 | 1                |                                 |
| ODF3B         | 0,522            | 0,012071538 | 1                |                                 |
| AP000295,9    | 0,517            | 0,005486546 | 1                |                                 |
| C1QA          | 0,501            | 0,034607742 | 1                |                                 |
| SAP30         | 0,492            | 0,048799636 | 1                |                                 |
| S100A13       | 0,487            | 0,022434082 | 1                |                                 |
| AIM2          | 0,483            | 0,042747173 | 1                | Yes                             |
| SLC26A1       | 0,469            | 0,020017057 | 1                |                                 |

|          |        |             |   |     |
|----------|--------|-------------|---|-----|
| CASP5    | 0,461  | 0,047213855 | 1 | Yes |
| MSR1     | 0,453  | 0,03842017  | 1 |     |
| DDO      | 0,445  | 0,024154433 | 1 |     |
| SAMD4A   | 0,432  | 0,046899458 | 1 |     |
| TAGLN    | 0,428  | 0,009172894 | 1 |     |
| EPST11   | 0,426  | 0,040747824 | 1 |     |
| RELL2    | 0,425  | 0,01457999  | 1 |     |
| SDC3     | 0,425  | 0,038277269 | 1 |     |
| HSPA6    | 0,424  | 0,007136701 | 1 |     |
| IL15RA   | 0,414  | 0,025549244 | 1 |     |
| CTSL1    | 0,413  | 0,049300247 | 1 |     |
| NAT1     | 0,410  | 0,033721274 | 1 |     |
| XAF1     | 0,405  | 0,00844103  | 1 |     |
| GALNT4   | 0,399  | 0,033197071 | 1 |     |
| P2RY6    | 0,393  | 0,041702275 | 1 |     |
| ADAMTSL4 | 0,393  | 0,019912378 | 1 |     |
| MYOF     | 0,391  | 0,038590773 | 1 |     |
| MAP3K6   | 0,391  | 0,014946439 | 1 |     |
| ITPKC    | 0,391  | 0,006776491 | 1 |     |
| TRIM69   | 0,378  | 0,026317866 | 1 |     |
| PLB1     | 0,378  | 0,015327207 | 1 |     |
| ECHDC3   | 0,378  | 0,046631846 | 1 |     |
| ACSL5    | 0,373  | 0,041736198 | 1 |     |
| FGFBP2   | -0,383 | 0,036547248 | 1 |     |
| MXRA7    | -0,384 | 0,035192129 | 1 |     |
| MSRB3    | -0,387 | 0,049149542 | 1 |     |
| TIMM23B  | -0,390 | 0,035140792 | 1 |     |
| TGFBR3   | -0,401 | 0,045763291 | 1 |     |
| CDCA7L   | -0,411 | 0,041833477 | 1 |     |
| CNR2     | -0,416 | 0,041451689 | 1 |     |
| IL2RB    | -0,419 | 0,021796056 | 1 |     |
| C20orf94 | -0,421 | 0,044428167 | 1 |     |
| SLAIN1   | -0,424 | 0,023593214 | 1 |     |
| NEDD4L   | -0,426 | 0,018960637 | 1 |     |
| GNG7     | -0,434 | 0,005636585 | 1 |     |
| KLHL11   | -0,437 | 0,041508149 | 1 |     |
| RALGPS2  | -0,437 | 0,014769466 | 1 |     |
| MLLT4    | -0,456 | 0,011866502 | 1 |     |
| AKAP12   | -0,462 | 0,042275449 | 1 |     |
| SPIN4    | -0,463 | 0,019648875 | 1 |     |
| PEAK1    | -0,467 | 0,025074986 | 1 |     |
| NCAM1    | -0,474 | 0,033383214 | 1 |     |
| DLG3     | -0,476 | 0,014970698 | 1 |     |
| IMMP1L   | -0,481 | 0,032162565 | 1 |     |
| OSBPL10  | -0,486 | 0,041137124 | 1 |     |

|              |        |             |   |
|--------------|--------|-------------|---|
| ODZ1         | -0,490 | 0,009195945 | 1 |
| RGPD8        | -0,490 | 0,041652867 | 1 |
| ZNF530       | -0,500 | 0,044470425 | 1 |
| C1orf150     | -0,511 | 0,027267936 | 1 |
| COBLL1       | -0,519 | 0,011564114 | 1 |
| FCGBP        | -0,521 | 0,049809413 | 1 |
| CHCHD6       | -0,523 | 0,011609497 | 1 |
| GAMT         | -0,526 | 0,024019948 | 1 |
| CPA3         | -0,538 | 0,019933671 | 1 |
| CTD-2370N5,3 | -0,548 | 0,007710109 | 1 |
| STAP1        | -0,565 | 0,039062657 | 1 |
| PKIG         | -0,566 | 0,015368835 | 1 |
| MKL2         | -0,578 | 0,023032849 | 1 |
| FAM46C       | -0,581 | 0,034520654 | 1 |
| CEBPE        | -0,582 | 0,037397591 | 1 |
| MS4A2        | -0,591 | 0,021189027 | 1 |
| BOLA2B       | -0,593 | 0,04410199  | 1 |
| CCDC144A     | -0,601 | 0,00472668  | 1 |
| HRH4         | -0,602 | 0,030961183 | 1 |
| KIAA0125     | -0,629 | 0,029173614 | 1 |
| B3GNT7       | -0,650 | 0,032271663 | 1 |
| MPO          | -0,665 | 0,004482082 | 1 |
| BOK          | -0,669 | 0,022048785 | 1 |
| FCRL2        | -0,679 | 0,015633107 | 1 |
| CD79A        | -0,683 | 0,026484315 | 1 |
| KLRC4        | -0,687 | 0,036115179 | 1 |
| FCRLA        | -0,695 | 0,025595649 | 1 |
| CXCR5        | -0,704 | 0,041310191 | 1 |
| CYP4F3       | -0,704 | 0,02310979  | 1 |
| AKAP5        | -0,707 | 0,035020594 | 1 |
| FCRL1        | -0,722 | 0,026794196 | 1 |
| PAWR         | -0,724 | 0,003336898 | 1 |
| PHLDB2       | -0,740 | 0,004978222 | 1 |
| MS4A3        | -0,749 | 0,003834872 | 1 |
| ZNF682       | -0,794 | 0,017502381 | 1 |
| BPI          | -0,848 | 0,032467668 | 1 |
| PAX5         | -0,861 | 0,026631795 | 1 |
| OLR1         | -0,880 | 0,045409412 | 1 |
| AZU1         | -0,932 | 0,011789709 | 1 |
| MMP9         | -0,933 | 0,007418439 | 1 |
| ANXA3        | -0,955 | 0,013815894 | 1 |
| RNASE3       | -1,025 | 0,010708942 | 1 |
| ARG1         | -1,029 | 0,031452281 | 1 |
| PRTN3        | -1,061 | 0,003816369 | 1 |
| MMP8         | -1,184 | 0,026781144 | 1 |

|         |        |             |   |
|---------|--------|-------------|---|
| MYH3    | -1,202 | 0,008838566 | 1 |
| CHI3L1  | -1,243 | 0,019414398 | 1 |
| SLPI    | -1,246 | 0,003432196 | 1 |
| CA1     | -1,275 | 0,005140457 | 1 |
| DEFA4   | -1,301 | 0,014181587 | 1 |
| LCN2    | -1,335 | 0,005350238 | 1 |
| OLFM4   | -1,365 | 0,010038908 | 1 |
| CAMP    | -1,457 | 0,003688937 | 1 |
| LTF     | -1,494 | 0,00594477  | 1 |
| CRISP3  | -1,501 | 0,00300253  | 1 |
| DEFA1   | -1,563 | 0,017337127 | 1 |
| CEACAM8 | -1,593 | 0,003724853 | 1 |
| ALAS2   | -1,668 | 0,010983346 | 1 |
| SLC4A1  | -1,990 | 0,007938291 | 1 |
| HBG2    | -2,243 | 0,004283171 | 1 |

**Supplementary Table 8 – Maintained upregulated and downregulated genes.**

This table shows the differentially expressed genes which were upregulated at BCG6 and remain upregulated at pre-BCG7, as well as the downregulated genes at BCG6 which remain downregulated at pre-BCG7 (all at  $p_{\text{adj}} < 0.05$ ). Candidate trained immunity genes are indicated.

| <b>Genes that remain upregulated between BCG6 and Pre-BCG7</b>   | <b>Candidate trained immunity gene</b> |
|------------------------------------------------------------------|----------------------------------------|
| ACE                                                              |                                        |
| AIM2                                                             | Yes                                    |
| C1QA                                                             |                                        |
| CASP5                                                            | Yes                                    |
| DDO                                                              |                                        |
| ECHDC3                                                           |                                        |
| EPST11                                                           |                                        |
| FAM20A                                                           |                                        |
| GBP1                                                             | Yes                                    |
| HSPA6                                                            |                                        |
| IL15RA                                                           |                                        |
| ITGA7                                                            |                                        |
| KCNMA1                                                           |                                        |
| MEF2BNB-MEF2B                                                    |                                        |
| MUC1                                                             |                                        |
| NAT1                                                             |                                        |
| NME2                                                             |                                        |
| ODF3B                                                            |                                        |
| RUFY4                                                            |                                        |
| S100A13                                                          |                                        |
| SAMD4A                                                           |                                        |
| SDC3                                                             |                                        |
| SLAMF8                                                           |                                        |
| SLC26A1                                                          |                                        |
| TGM2                                                             |                                        |
| TRIM69                                                           |                                        |
| <b>Genes that remain downregulated between BCG6 and Pre-BCG7</b> | <b>Candidate trained immunity gene</b> |
| AKAP5                                                            |                                        |
| B3GNT7                                                           |                                        |
| BOK                                                              |                                        |
| CA1                                                              |                                        |
| CCDC144A                                                         |                                        |
| CD79A                                                            |                                        |
| CXCR5                                                            |                                        |
| DLG3                                                             |                                        |
| FCGBP                                                            |                                        |
| FCRL1                                                            |                                        |
| FCRL2                                                            |                                        |
| FCRLA                                                            |                                        |



|         |  |
|---------|--|
| FGFBP2  |  |
| HBA1    |  |
| HBA2    |  |
| HBB     |  |
| IL2RB   |  |
| KLRC4   |  |
| ODZ1    |  |
| OSBPL10 |  |
| PAWR    |  |
| PAX5    |  |
| PKIG    |  |
| RALGPS2 |  |
| SLAIN1  |  |
| SLC4A1  |  |
| TGFBR3  |  |

**Supplementary Table 9 - Characteristics of NMIBC patients from the BlaZIB and UroLife studies that were part of the study into BCG exposure and respiratory infections.**

|                                                                       | BCG-exposed | Partially BCG-exposed | BCG-unexposed | p-value for comparison* |
|-----------------------------------------------------------------------|-------------|-----------------------|---------------|-------------------------|
| Total n                                                               | 109         | 298                   | 250           | -                       |
| Female sex (%)                                                        | 15 (13.8)   | 49 (16.4)             | 52 (20.8)     | 0.208                   |
| Age at questionnaire (median (range))                                 | 71 (42-85)  | 70 (44-90)            | 70 (27-92)    | 0.411                   |
| Flu vaccination in previous 2 years (%)                               | 72 (66.1)   | 189 (63.4)            | 164 (65.6)    | 0.823                   |
| BCG vaccination ever (%)                                              | 16 (14.7)   | 56 (18.8)             | 50 (20.0)     | 0.487                   |
| History of chronic lung disease (asthma, COPD, bronchitis, emphysema) | 16 (14.7)   | 42 (14.1)             | 38 (15.2)     | 0.935                   |
| Never smoker (%)                                                      | 17 (15.6)   | 59 (19.8)             | 55 (22.0)     | 0.408                   |
| Previous smoker (%)                                                   | 79 (72.5)   | 216 (72.5)            | 169 (67.6)    | -                       |
| Current smoker (%)                                                    | 13 (11.9)   | 23 (7.7)              | 26 (10.4)     | -                       |

\*Kruskal-Wallis test for age and Chi-square test other variables

**Supplementary Table 10 - Results of the multivariable association analysis for BCG exposure and respiratory infections among NMIBC patients in the BlaZIB and UroLife studies.**

|                  | NMIBC BCG  |           |                   | NMIBC<br>no BCG | Adjusted* ORs (95% CI) NMIBC patients |                                 |                   |
|------------------|------------|-----------|-------------------|-----------------|---------------------------------------|---------------------------------|-------------------|
|                  | Total      | Exposed   | Partially exposed |                 | Exposed versus no BCG                 | Partially exposed versus no BCG | BCG versus no BCG |
| Total            | 407        | 109       | 298               | 250             | -                                     | -                               | -                 |
| Pneumonia (%)    | 23 (5.7)   | 4 (3.7)   | 19 (6.4)          | 22 (8.8)        | 0.39 (0.13-1.18)                      | 0.68 (0.36-1.32)                | 0.60 (0.32-1.12)  |
| Bronchitis (%)   | 11 (2.7)   | 5 (4.6)   | 6 (2.0)           | 10 (4.0)        | 1.23 (0.40-3.80)                      | 0.53 (0.19-1.51)                | 0.72 (0.29-1.75)  |
| Laryngitis (%)   | 20 (4.9)   | 6 (5.5)   | 14 (4.7)          | 16 (6.4)        | 0.93 (0.35-2.51)                      | 0.76 (0.36-1.62)                | 0.80 (0.40-1.61)  |
| Flu (%)          | 72 (17.7)  | 19 (17.4) | 53 (17.8)         | 50 (20.0)       | 0.89 (0.49-1.61)                      | 0.87 (0.56-1.34)                | 0.87 (0.58-1.31)  |
| Cold (%)         | 223 (54.8) | 53 (48.6) | 170 (57.0)        | 155 (62.0)      | 0.60 (0.38-0.95)                      | 0.85 (0.60-1.20)                | 0.77 (0.56-1.07)  |
| All above RI (%) | 254 (62.4) | 63 (57.8) | 191 (64.1)        | 171 (68.4)      | 0.65 (0.40-1.04)                      | 0.85 (0.59-1.22)                | 0.79 (0.56-1.11)  |

\* Adjusted for age (continuous variable), sex (female versus male), smoking (3 categories), chronic lung disease (yes vs no), flu vaccination in 2018/2019 (yes vs no). CI=confidence interval. RI=respiratory infections.

**Supplementary Table 11 - Characteristics of the Nijmegen Bladder Cancer Study population that received at least 5 BCG instillations and was included in the exome chip analyses for NMIBC recurrence and progression.**

|                                                                                |                                | <b>n = 215 (%)</b> |
|--------------------------------------------------------------------------------|--------------------------------|--------------------|
| <b>Gender</b>                                                                  | Male                           | 189 (88.1)         |
|                                                                                | Female                         | 26 (11.9)          |
| <b>Median age at diagnosis (range; in years)</b>                               |                                | 65 (39 – 83)       |
| <b>Smoking status (cigarettes) at time of diagnosis</b>                        | Never smoker                   | 34 (15.8)          |
|                                                                                | Former smoker                  | 109 (50.7)         |
|                                                                                | Current smoker                 | 40 (18.6)          |
|                                                                                | Missing                        | 32 (14.9)          |
| <b>Primary tumor stage<sup>1</sup></b>                                         |                                |                    |
|                                                                                | Ta                             | 16 (7.4)           |
|                                                                                | Ta+CIS                         | 17 (7.9)           |
|                                                                                | T1                             | 83 (38.6)          |
|                                                                                | T1+CIS                         | 46 (21.4)          |
|                                                                                | CIS                            | 49 (22.8)          |
|                                                                                | Unknown                        | 4 (1.9)            |
| <b>Primary tumor grade<sup>1</sup></b>                                         | Low grade                      | 13 (6.0)           |
|                                                                                | High grade                     | 200 (93.0)         |
|                                                                                | Unknown                        | 2 (0.9)            |
| <b>BCG instillations</b>                                                       | iBCG (≥5 instillations)        | 215 (100.0)        |
|                                                                                | iBCG + mBCG (≥7 instillations) | 137 (63.7)         |
|                                                                                |                                |                    |
| <b>Recurrence<sup>2</sup></b>                                                  |                                | 79 (36.7)          |
| <b>Median time at risk for recurrence<sup>2</sup> (IQR; in years)</b>          |                                | 2.8 (1.2 – 5.0)    |
| <b>Progression<sup>2</sup></b>                                                 |                                | 47 (21.9)          |
| <b>Median time at risk for progression<sup>2</sup> (IQR; in years)</b>         |                                | 4.0 (2.1 – 5.0)    |
| <b>Progression to MIBC<sup>2</sup></b>                                         |                                | 17 (7.9)           |
| <b>Median time at risk for progression to MIBC<sup>2</sup> (IQR; in years)</b> |                                | 4.5 (2.4 – 5.0)    |
| <b>Median follow-up time (IQR; in years)</b>                                   |                                | 4.7 (2.9 – 8.5)    |

CIS = Carcinoma in situ; BCG = Bacillus Calmette-Guérin; iBCG = induction therapy of BCG; mBCG = maintenance therapy of BCG; IQR = interquartile range; 1 = highest tumor stage/grade based in transurethral resection of the (bladder) tumor (TUR) and reTUR combined. 2 = restricted to the first five years after diagnosis.

**Supplementary Table 12 - Results of the association analysis of low and rare-frequency variants and clinical outcome in patients of the Nijmegen Bladder Cancer Study (NBCS).**

The clinical outcomes which were assessed were recurrence free survival and progression free survival.

Each sub-table shows the candidate trained immunity genes and their association with RFS or PFS after 5 or more and 7 or more BCG instillations.

RFS=recurrence free survival. PFS=progression free survival.

**Supplementary Table 12.1 - RFS and  $\geq 5$  BCG instillations.**

**Displays the genes that associate with recurrence free survival after 5 or more BCG instillations.**

| gene_name | p.value       | Q            | n.marker.test | n.indiv | df          | npatients | nsnvs_incl_monom |
|-----------|---------------|--------------|---------------|---------|-------------|-----------|------------------|
| AIM2      | 0,6668        | -24,75979723 | 3             | 215     | 1,057379136 | 215       | 3                |
| ATG16L1   | 0,1454        | 132,0898301  | 3             | 215     | 1,038824298 | 215       | 4                |
| ATG16L2   | 1             | -1,086464384 | 1             | 215     | 0,984934949 | 215       | 2                |
| ATG2B     | <b>0,0552</b> | 97,7492291   | 9             | 215     | 1,431773137 | 215       | 19               |
| ATG7      | <b>0,0518</b> | 103,4755519  | 3             | 215     | 1,360649517 | 215       | 6                |
| CASP1     | 0,9941        | -63,77052844 | 17            | 215     | 3,132342687 | 215       | 25               |
| CASP5     | 0,3916        | -4,601733516 | 5             | 215     | 2,388367352 | 215       | 10               |
| EHMT2     | 0,92          | -36,51371431 | 4             | 215     | 1,388883661 | 215       | 5                |
| GBP1      | 0,9872        | -29,65079869 | 5             | 215     | 1,858544486 | 215       | 9                |
| GBP2      | 0,7278        | -29,06109049 | 3             | 215     | 1,238003061 | 215       | 3                |
| GBP3      | 0,7812        | -80,66169322 | 4             | 215     | 1,450503533 | 215       | 5                |
| GBP4      | 0,6805        | -92,65114213 | 3             | 215     | 1,024674623 | 215       | 9                |
| GBP5      | 0,2625        | 0,703323814  | 2             | 215     | 1,729617129 | 215       | 5                |
| HK2       | 0,6194        | -31,79680752 | 7             | 215     | 2,115140923 | 215       | 11               |
| HNF1A     | 0,1993        | 155,1363473  | 9             | 215     | 1,52379629  | 215       | 11               |
| HNF1B     | 0,3863        | -12,36817055 | 3             | 215     | 1,230580783 | 215       | 3                |
| IL18      | 0,3705        | -0,651576851 | 7             | 215     | 2,593914192 | 215       | 8                |
| IL1RN     | 0,5804        | -23,88814133 | 2             | 215     | 1,014198219 | 215       | 3                |
| IL32      | 1             | -0,21718186  | 1             | 215     | 0,990179793 | 215       | 3                |
| IL6       | 0,9394        | -197,9905753 | 17            | 215     | 2,56983184  | 215       | 26               |
| KDM4A     | 1             | -27,82896042 | 2             | 215     | 1,095446347 | 215       | 6                |
| KDM4B     | 0,341         | -0,04469697  | 1             | 215     | 0,966828439 | 215       | 4                |
| KDM4C     | 0,3043        | 41,91837758  | 9             | 215     | 5,674905477 | 215       | 11               |
| KDM4D     | 0,753         | -24,48704195 | 7             | 215     | 1,826573384 | 215       | 8                |
| NLRP3     | 0,8646        | -57,36367658 | 3             | 215     | 1,197414773 | 215       | 5                |
| NOD2      | 0,4167        | -17,53755037 | 14            | 215     | 2,245635429 | 215       | 23               |
| PFKP      | 0,2341        | 11,30863118  | 5             | 215     | 1,319013323 | 215       | 7                |
| RIPK2     | 0,5976        | -6,938540745 | 1             | 215     | 1,015876256 | 215       | 2                |
| TNF       | 0,336         | 126,3212538  | 127           | 215     | 28,81735127 | 215       | 202              |

**Supplementary Table 12.2 - RFS and  $\geq 7$  BCG instillations.**

Displays the genes that associate with recurrence free survival after 7 or more BCG instillations.

| gene_name | p.value       | Q            | n.marker.test | n.indiv | df          | npatients | nsnvs_incl_monom |
|-----------|---------------|--------------|---------------|---------|-------------|-----------|------------------|
| AIM2      | 0,0781        | 33,65764805  | 2             | 137     | 1,100489021 | 137       | 3                |
| ATG16L1   | <b>0,058</b>  | 151,9812802  | 3             | 137     | 0,944930974 | 137       | 4                |
| ATG16L2   | 1             | -1,181467244 | 1             | 137     | 1,000094082 | 137       | 2                |
| ATG2B     | 0,1165        | 26,59945526  | 8             | 137     | 1,508927714 | 137       | 19               |
| ATG7      | <b>0,0521</b> | 59,55106554  | 2             | 137     | 1,19111002  | 137       | 6                |
| CASP1     | 0,6011        | -13,23106529 | 15            | 137     | 2,993560518 | 137       | 25               |
| CASP5     | 0,5268        | -13,73028304 | 5             | 137     | 2,533260981 | 137       | 10               |
| EHMT2     | 0,6743        | -14,17080557 | 4             | 137     | 1,254431329 | 137       | 5                |
| GBP1      | 0,1929        | 8,401708316  | 5             | 137     | 1,867480934 | 137       | 9                |
| GBP2      | 0,2868        | 2,605382105  | 3             | 137     | 1,558320155 | 137       | 3                |
| GBP3      | 0,614         | -28,43534132 | 4             | 137     | 1,444531064 | 137       | 5                |
| GBP4      | 0,1745        | 39,0865001   | 3             | 137     | 0,97726995  | 137       | 9                |
| GBP5      | 0,476         | -0,514678761 | 2             | 137     | 1,86123812  | 137       | 5                |
| HK2       | 0,8324        | -23,86979026 | 6             | 137     | 2,10002091  | 137       | 11               |
| HNF1A     | 0,6898        | -96,21051718 | 9             | 137     | 1,49764708  | 137       | 11               |
| HNF1B     | <b>0,0427</b> | 96,88458053  | 3             | 137     | 1,108303292 | 137       | 3                |
| IL18      | 0,4928        | -11,71938247 | 7             | 137     | 2,770039732 | 137       | 8                |
| IL1RN     | 0,6515        | -13,39071923 | 2             | 137     | 1,018522656 | 137       | 3                |
| IL32      | 1             | -0,160342383 | 1             | 137     | 0,999331758 | 137       | 3                |
| IL6       | 0,3123        | 11,37240346  | 15            | 137     | 2,242202684 | 137       | 26               |
| KDM4A     | 0,2429        | 3,661767252  | 2             | 137     | 1,07127914  | 137       | 6                |
| KDM4C     | 0,5878        | -27,97011101 | 9             | 137     | 5,715745233 | 137       | 11               |
| KDM4D     | 0,7464        | -11,92794231 | 6             | 137     | 1,874059787 | 137       | 8                |
| NLRP3     | 1             | -35,06664189 | 2             | 137     | 1,20817639  | 137       | 5                |
| NOD2      | 0,6083        | -20,31787809 | 13            | 137     | 2,166036649 | 137       | 23               |
| PFKP      | 0,3695        | -2,111171642 | 4             | 137     | 1,210588537 | 137       | 7                |
| RIPK2     | 0,8329        | -4,877370114 | 1             | 137     | 0,998522945 | 137       | 2                |
| TNF       | 0,1967        | 181,7768161  | 118           | 137     | 24,36444595 | 137       | 202              |

**Supplementary Table 12.3 - PFS and  $\geq 5$  BCG instillations.**

Displays the genes that associate with progression free survival after 5 or more BCG instillations.

| gene_name | p.value       | Q            | n.marker.test | n.indiv | df          | npatients | nsnvs_incl_monom |
|-----------|---------------|--------------|---------------|---------|-------------|-----------|------------------|
| AIM2      | 0,5732        | -12,6009947  | 3             | 215     | 1,035972928 | 215       | 3                |
| ATG16L1   | 0,2317        | 28,9698611   | 3             | 215     | 1,027726132 | 215       | 4                |
| ATG16L2   | 0,0899        | 3,479819289  | 1             | 215     | 1,025741716 | 215       | 2                |
| ATG2B     | <b>0,008</b>  | 153,4451019  | 9             | 215     | 1,428609768 | 215       | 19               |
| ATG7      | 0,4691        | -11,10950223 | 3             | 215     | 1,305199874 | 215       | 6                |
| CASP1     | 0,7624        | -26,44204776 | 17            | 215     | 2,932521748 | 215       | 25               |
| CASP5     | 0,7842        | -33,1395669  | 5             | 215     | 2,377722736 | 215       | 10               |
| EHMT2     | <b>0,0053</b> | 130,6742915  | 4             | 215     | 1,482973027 | 215       | 5                |
| GBP1      | 0,8392        | -13,65944477 | 5             | 215     | 1,995389007 | 215       | 9                |

|       |        |              |     |     |             |     |     |
|-------|--------|--------------|-----|-----|-------------|-----|-----|
| GBP2  | 0,4482 | -8,651714394 | 3   | 215 | 1,346006045 | 215 | 3   |
| GBP3  | 0,8938 | -53,75550237 | 4   | 215 | 1,387036502 | 215 | 5   |
| GBP4  | 0,6771 | -57,22545556 | 3   | 215 | 0,971590925 | 215 | 9   |
| GBP5  | 0,5051 | -0,576733035 | 2   | 215 | 2,01332749  | 215 | 5   |
| HK2   | 0,8156 | -26,83707069 | 7   | 215 | 2,211541382 | 215 | 11  |
| HNF1A | 0,1557 | 154,5863827  | 9   | 215 | 1,578299375 | 215 | 11  |
| HNF1B | 0,4879 | -13,10416181 | 3   | 215 | 1,349908748 | 215 | 3   |
| IL18  | 0,2266 | 30,61977526  | 7   | 215 | 2,4513315   | 215 | 8   |
| IL1RN | 0,5132 | -12,09519724 | 2   | 215 | 1,007439781 | 215 | 3   |
| IL32  | 1      | -0,132201666 | 1   | 215 | 0,988142959 | 215 | 3   |
| IL6   | 0,2526 | 40,66687734  | 17  | 215 | 2,388292864 | 215 | 26  |
| KDM4A | 1      | -16,29219747 | 2   | 215 | 1,050785424 | 215 | 6   |
| KDM4B | 0,2735 | 0,190147994  | 1   | 215 | 0,986347146 | 215 | 4   |
| KDM4C | 0,2852 | 29,85031216  | 9   | 215 | 5,251538918 | 215 | 11  |
| KDM4D | 0,378  | -3,044346329 | 7   | 215 | 1,751831719 | 215 | 8   |
| NLRP3 | 0,3568 | -4,713791167 | 3   | 215 | 1,121792775 | 215 | 5   |
| NOD2  | 0,8412 | -42,98981127 | 14  | 215 | 2,211179458 | 215 | 23  |
| PFKP  | 0,6274 | -10,74069042 | 5   | 215 | 1,47312329  | 215 | 7   |
| RIPK2 | 1      | -5,976955764 | 1   | 215 | 0,996566772 | 215 | 2   |
| TNF   | 0,2839 | 125,9999296  | 127 | 215 | 23,89939862 | 215 | 202 |

**Supplementary Table 12.4 - PFS and  $\geq 7$  BCG instillations.**

Displays the genes that associate with progression free survival after 7 or more BCG instillations.

| gene_name | p.value         | Q            | n.marker.test | n.indiv | df          | npatients | nsnvs_incl_monom |
|-----------|-----------------|--------------|---------------|---------|-------------|-----------|------------------|
| AIM2      | 0,1546          | 9,063543939  | 2             | 137     | 1,009003898 | 137       | 3                |
| ATG16L1   | 0,327           | -0,571700501 | 3             | 137     | 1,064808361 | 137       | 4                |
| ATG16L2   | 0,0715          | 4,704832233  | 1             | 137     | 0,970200993 | 137       | 2                |
| ATG2B     | <b>0,0325</b>   | 44,60020007  | 8             | 137     | 1,33311765  | 137       | 19               |
| ATG7      | 0,3489          | -1,559441784 | 2             | 137     | 1,261291555 | 137       | 6                |
| CASP1     | 0,6829          | -10,96007196 | 15            | 137     | 2,771220887 | 137       | 25               |
| CASP5     | 0,7527          | -15,41816113 | 5             | 137     | 2,438596936 | 137       | 10               |
| EHMT2     | <b>5,00E-04</b> | 110,0870458  | 4             | 137     | 1,208050539 | 137       | 5                |
| GBP1      | 0,4174          | -1,58329662  | 5             | 137     | 2,029893373 | 137       | 9                |
| GBP2      | 0,2807          | 2,059582358  | 3             | 137     | 1,651557473 | 137       | 3                |
| GBP3      | 0,908           | -26,42021847 | 4             | 137     | 1,473808013 | 137       | 5                |
| GBP4      | 0,4963          | -15,87192298 | 3             | 137     | 1,007245417 | 137       | 9                |
| GBP5      | 0,371           | -0,045487272 | 2             | 137     | 1,909587288 | 137       | 5                |
| HK2       | 0,5669          | -6,933682488 | 6             | 137     | 2,506234496 | 137       | 11               |
| HNF1A     | 0,7746          | -79,25404939 | 9             | 137     | 1,414903873 | 137       | 11               |
| HNF1B     | 0,6077          | -9,348132027 | 3             | 137     | 1,14339123  | 137       | 3                |
| IL18      | 0,3446          | 1,579622961  | 7             | 137     | 2,446238991 | 137       | 8                |
| IL1RN     | 0,5007          | -5,833158786 | 2             | 137     | 0,981415478 | 137       | 3                |
| IL32      | 1               | -0,076845213 | 1             | 137     | 0,991893191 | 137       | 3                |
| IL6       | 0,6251          | -40,22948081 | 15            | 137     | 2,068295195 | 137       | 26               |
| KDM4A     | 1               | -7,581690349 | 2             | 137     | 1,015381476 | 137       | 6                |
| KDM4C     | 0,6696          | -26,06678812 | 9             | 137     | 4,870546662 | 137       | 11               |
| KDM4D     | 0,462           | -3,311955951 | 6             | 137     | 1,541533778 | 137       | 8                |
| NLRP3     | 1               | -20,25122951 | 2             | 137     | 1,152741114 | 137       | 5                |
| NOD2      | 0,6842          | -16,71527872 | 13            | 137     | 2,406863266 | 137       | 23               |
| PFKP      | 0,3             | 0,477739781  | 4             | 137     | 1,238970309 | 137       | 7                |
| RIPK2     | 0,9095          | -3,376995089 | 1             | 137     | 0,981292619 | 137       | 2                |
| TNF       | 0,5785          | -50,09080898 | 118           | 137     | 18,97301254 | 137       | 202              |

**Supplementary Table 13 - Primers that were used for ChIP-PCR analysis.**

| Gene        | Primer name   | Forward/Reverse | Sequence              |
|-------------|---------------|-----------------|-----------------------|
| <i>IL6</i>  | IL-6 region 1 | Forward         | TCGTGCATGACTTCAGCTTT  |
| <i>IL6</i>  | IL-6 region 1 | Reverse         | GCGCTAAGAAGCAGAACCAC  |
| <i>IL6</i>  | IL-6 region 2 | Forward         | AGGGAGAGCCAGAACACAGA  |
| <i>IL6</i>  | IL-6 region 2 | Reverse         | GAGTTTCCTCTGACTCCATCG |
| <i>TNF</i>  | TNF region 1  | Forward         | CAGGCAGTTCTCTTCCTCT   |
| <i>TNF</i>  | TNF region 1  | Reverse         | GCTTTCAGTGCTCATGGTGT  |
| <i>TNF</i>  | TNF region 2  | Forward         | AGAGGACCAGCTAAGAGGGA  |
| <i>TNF</i>  | TNF region 2  | Reverse         | AGCTTGTCAGGGGATGTGG   |
| <i>IL1B</i> | IL1B region 1 | Forward         | AATCCAGAGCAGCCTGTTG   |
| <i>IL1B</i> | IL1B region 1 | Reverse         | AACAGCGAGGGAGAACTGG   |
| <i>IL1B</i> | IL1B region 2 | Forward         | CATGGCTGCTTCAGACACCT  |
| <i>IL1B</i> | IL1B region 2 | Reverse         | ACACATGAACGTAGCCGTCA  |
